# Supplementary material for: Novel Natural Compounds and Their Anatomical Distribution in the Stinging Fireworm Hermodice carunculata (Annelida)
Source: MDPI journal article supplement (doi:10.3390/md20090585), 2022-09-19
Supplement: s1 [file s1]

Supplementary material to

# Novel Natural Compounds and Their Anatomical Distribution in the Stinging Fireworm *Hermodice carunculata* (Annelida)

Authors

Sara Righi <sup>1,\*</sup>, Luca Forti <sup>2</sup>, Roberto Simonini <sup>1</sup>, Valentina Ferrari <sup>1</sup>, Daniela Prevedelli <sup>1</sup> and Adele Mucci <sup>3</sup>

<sup>1</sup> Department of Life Sciences, University of Modena and Reggio Emilia, Via Campi 213/D, 41125 Modena, Italy

<sup>2</sup> Department of Life Sciences, University of Modena and Reggio Emilia, Via Campi 103, 41125 Modena, Italy

<sup>3</sup> Department of Chemical and Geological Sciences, University of Modena and Reggio Emilia, Via Campi 103, 41125 Modena, Italy

\* Correspondence: sara.righi@unimore.it

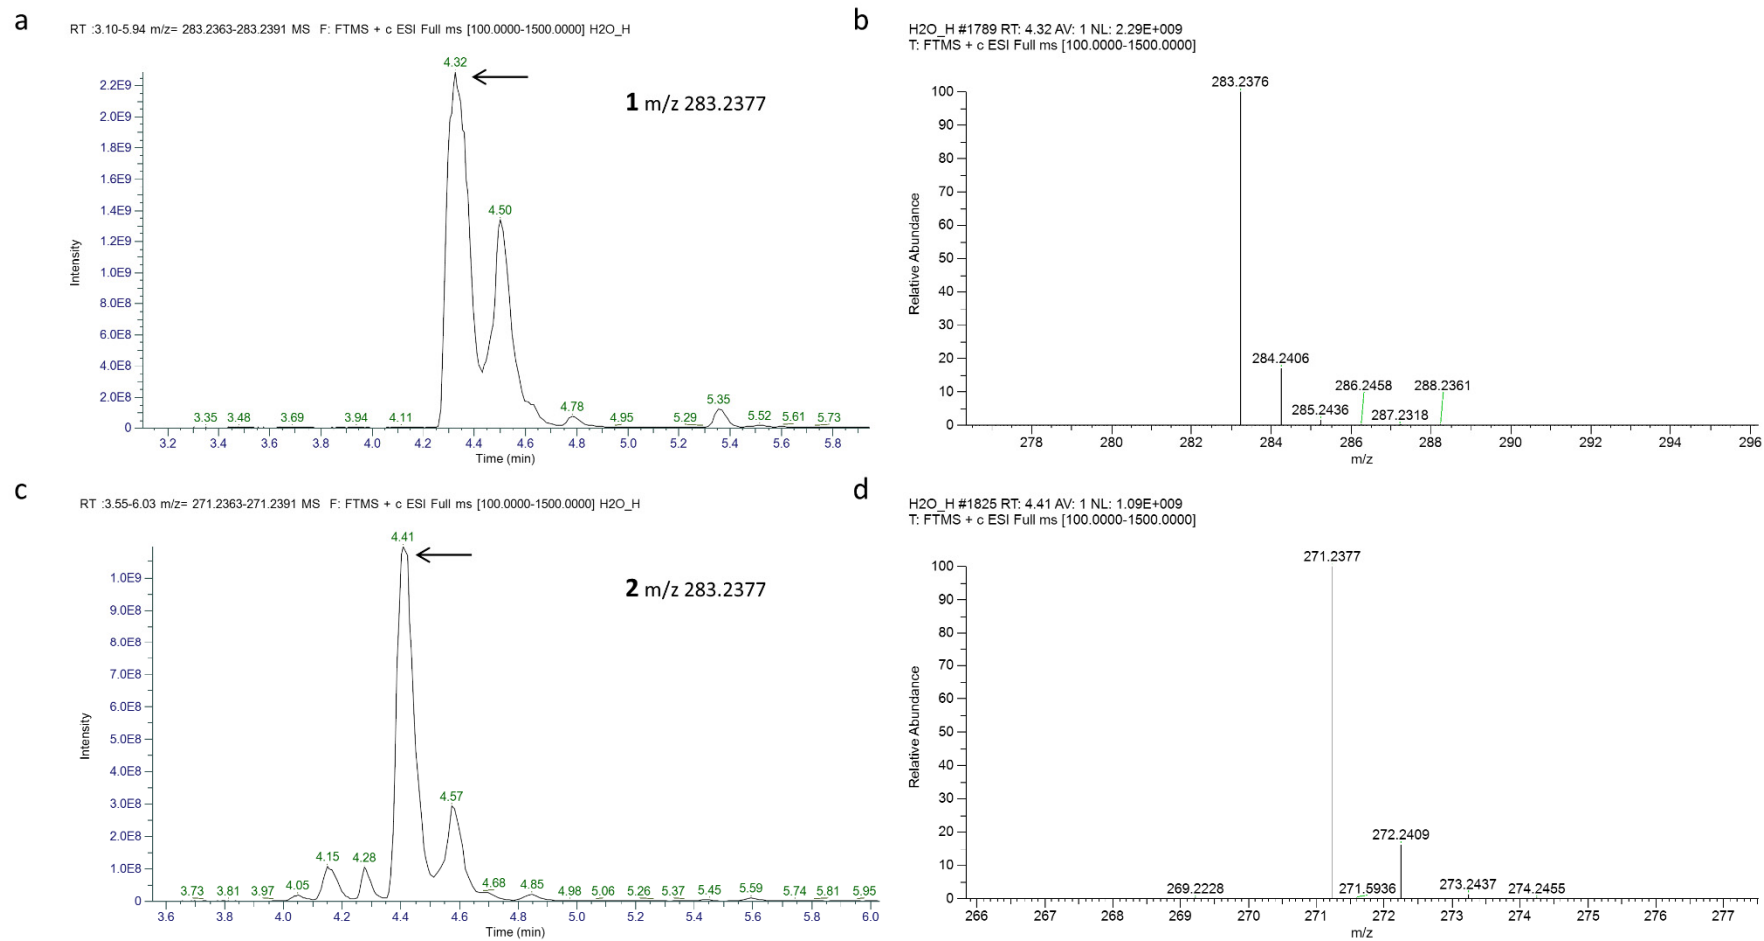

**Figure S1 (a-l).** Extracted ion chromatograms of carunculines (**1-8**) (a,c,e,g,i,k,m,o) and related spectra (b,d,f,h,j,l,n,p). When multiple isomers occurred, the black arrows indicate the peak to which the spectrum is referred.

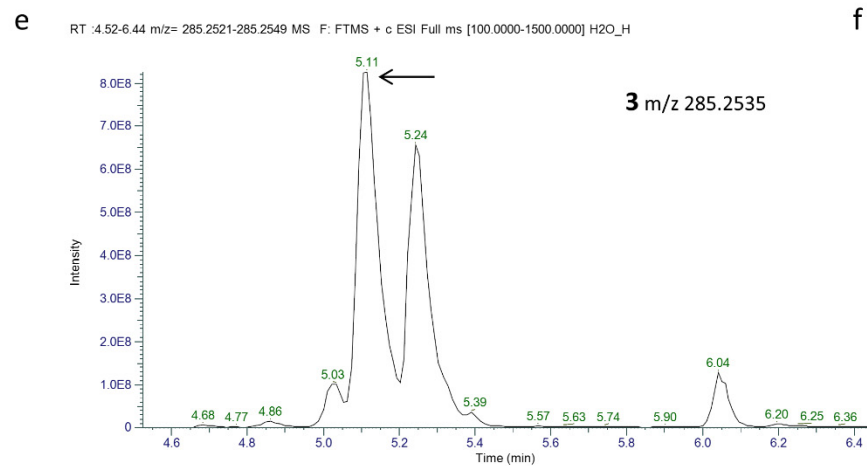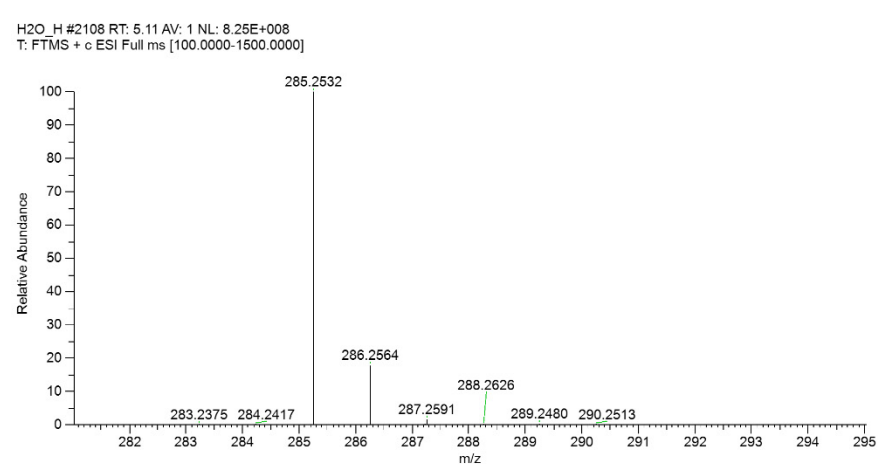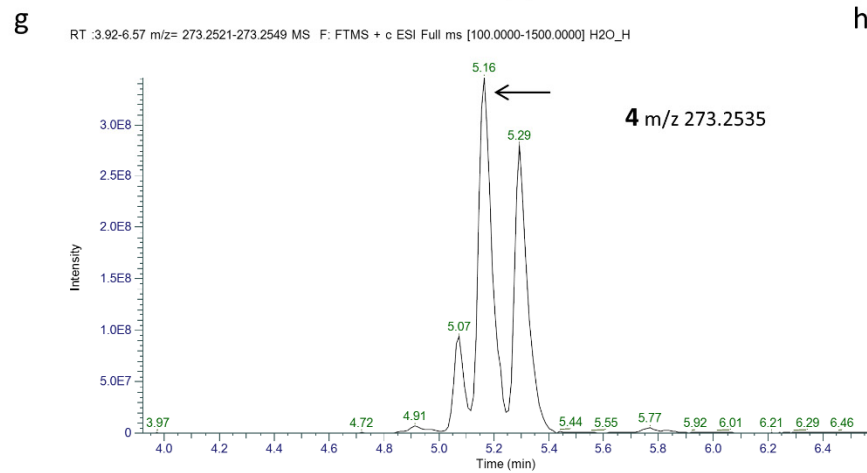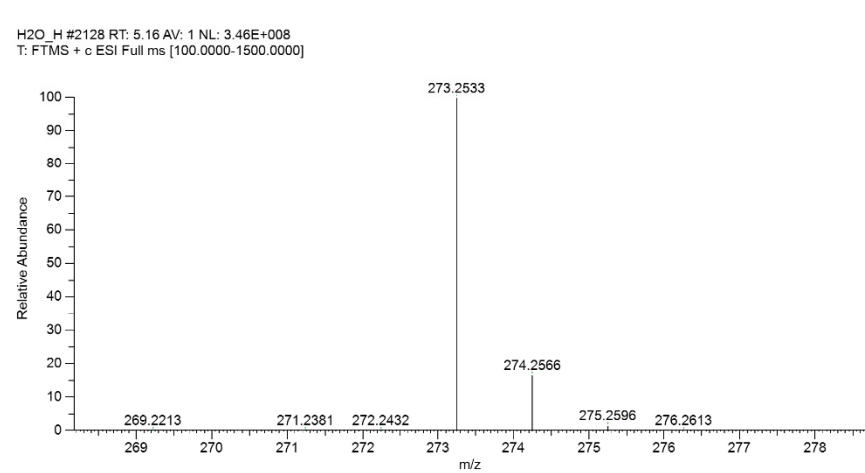

**Figure S1 (a-l).** Continue.

i

RT :4.57-6.76 m/z= 309.2520-309.2550 MS F: FTMS + c ESI Full ms [100.0000-1500.0000] H2O\_H

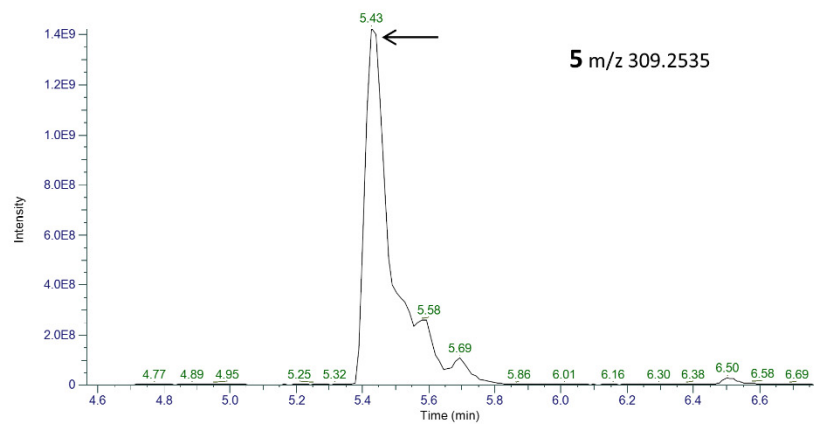

j

H2O\_H #2234 RT: 5.43 AV: 1 NL: 1.42E+009  
T: FTMS + c ESI Full ms [100.0000-1500.0000]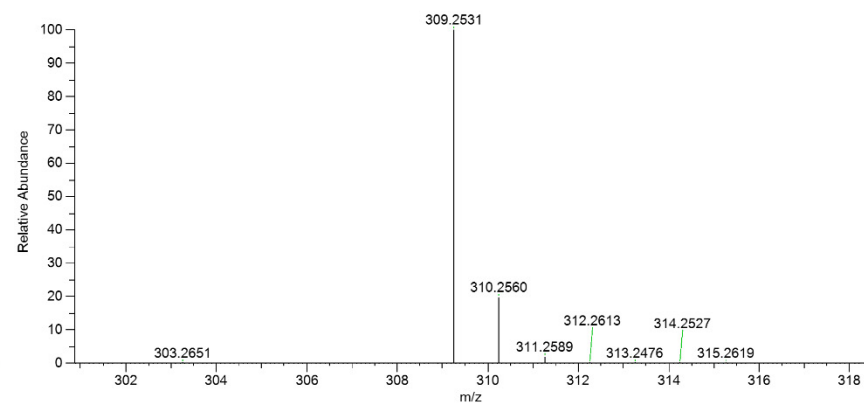

k

RT :4.46-6.48 m/z= 297.2520-297.2550 MS F: FTMS + c ESI Full ms [100.0000-1500.0000] H2O\_H

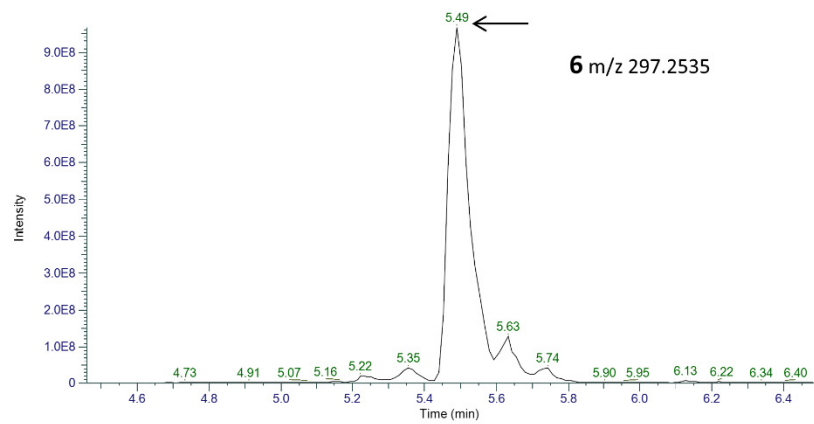

l

H2O\_H #2259 RT: 5.49 AV: 1 NL: 9.67E+008  
T: FTMS + c ESI Full ms [100.0000-1500.0000]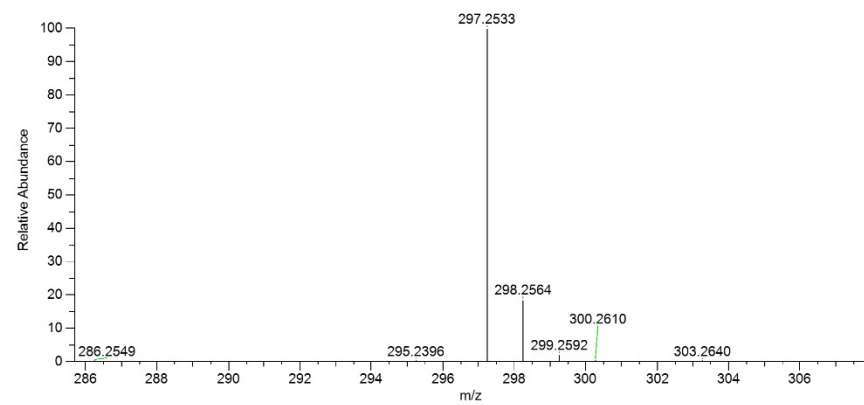

Figure S1 (a-l). Continue.

m

RT :5.04-7.52 m/z= 299.2678-299.2708 MS F: FTMS + c ESI Full ms [100.0000-1500.0000] H2O\_H

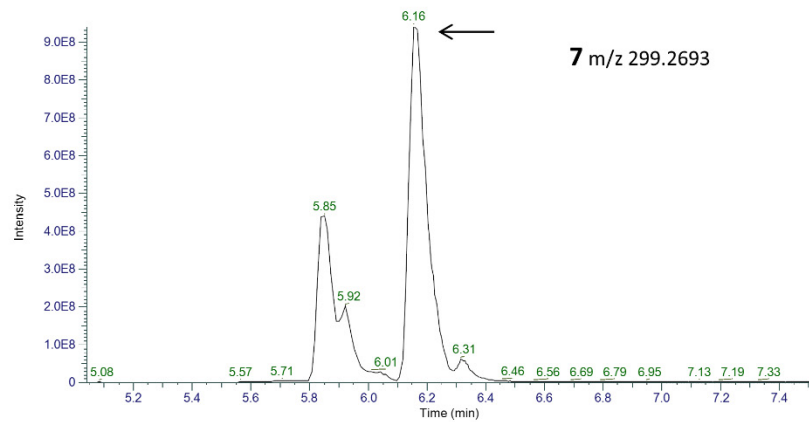

n

H2O\_H #2528 RT: 6.17 AV: 1 NL: 9.31E+008  
T: FTMS + c ESI Full ms [100.0000-1500.0000]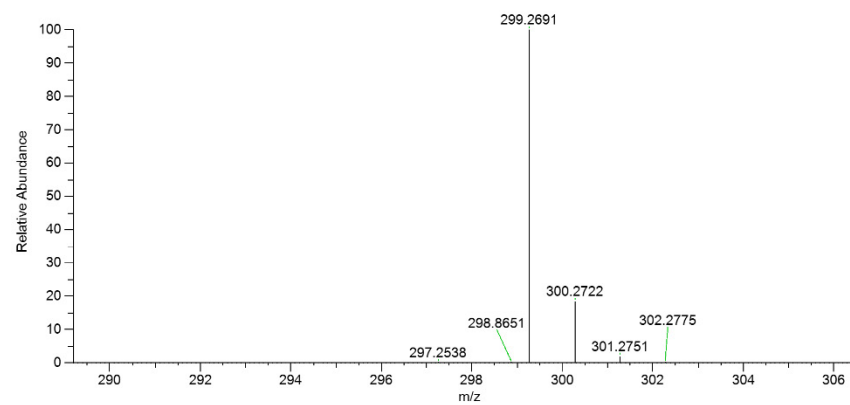

o

RT :5.38-7.37 m/z= 311.2677-311.2709 MS F: FTMS + c ESI Full ms [100.0000-1500.0000] H2O\_H

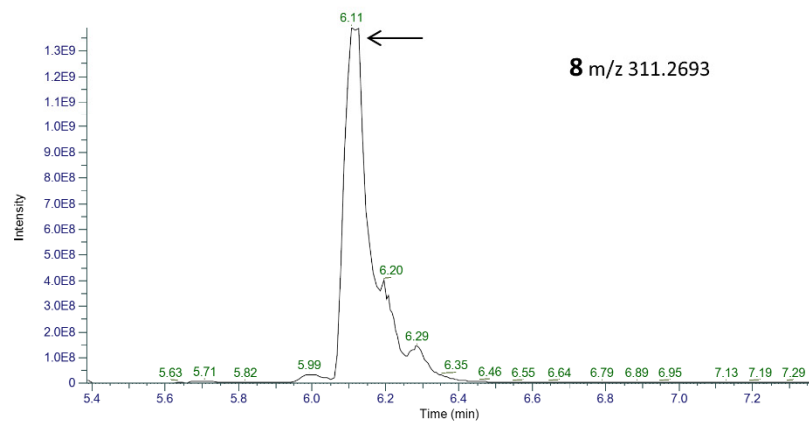

p

H2O\_H #2508 RT: 6.12 AV: 1 NL: 1.38E+009  
T: FTMS + c ESI Full ms [100.0000-1500.0000]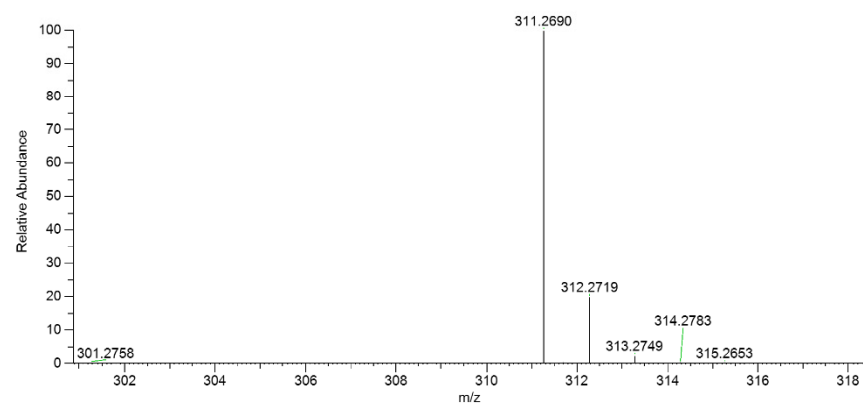

Figure S1 (a-l). Continue.

**Table S1.** Different mixtures of solvents (mobile phases) tested for column chromatography on silica gel. The weight of the extracts after partitioning and of singular fractions ("Fr") are reported. EtOAc = ethyl acetate; AcOH = acetic acid.

| Test n. | Extract after partitioning (mg) | Mobile phase                                                                                                                                                                                                                                                | Fr 1 (mg) | Fr 2 (mg) | Fr 3 (mg) | Fr 4 (mg) | Fr 5 (mg) | Fr 6 (mg) | Fr 7 (mg) |
|---------|---------------------------------|-------------------------------------------------------------------------------------------------------------------------------------------------------------------------------------------------------------------------------------------------------------|-----------|-----------|-----------|-----------|-----------|-----------|-----------|
| 1A      | 2738.0                          | 1) CHCl <sub>3</sub> , 2) CHCl <sub>3</sub> -MeOH (2:1), 3) CHCl <sub>3</sub> -MeOH-H <sub>2</sub> O-AcOH (10:5:1:0.06), 4) MeOH                                                                                                                            | 12.9      | 15.3      | 447.0     | 154.0     | /         | /         | /         |
| 1B      |                                 | 1) CHCl <sub>3</sub> -MeOH (3:1) 2) CHCl <sub>3</sub> -MeOH (2:1), 3) CHCl <sub>3</sub> -MeOH (1:1), 4) CHCl <sub>3</sub> -MeOH (1:2), 5) MeOH                                                                                                              | 15.4      | 11.9      | 18.1      | 16.9      | 8.1       | /         | /         |
| 2       | *                               | 1) CHCl <sub>3</sub> , 2) CHCl <sub>3</sub> -MeOH (2:1), 3) CHCl <sub>3</sub> -MeOH (1:1), 4) CHCl <sub>3</sub> -MeOH (1:2), 5) MeOH                                                                                                                        | *         | 169.0     | 64.0      | 38.0      | 13.0      | /         | /         |
| 3       | 812.0                           | 1) CHCl <sub>3</sub> -MeOH (3:1), 2) CHCl <sub>3</sub> -MeOH (2:1), 3) MeOH                                                                                                                                                                                 | 266.0     | 243.0     | 79.0      | /         | /         | /         | /         |
| 4       | 291.1                           | 1) CH <sub>2</sub> Cl <sub>2</sub> -MeOH (3:1), 2) CH <sub>2</sub> Cl <sub>2</sub> -MeOH (2:1), 3) CH <sub>2</sub> Cl <sub>2</sub> -MeOH (1:1), 4) CH <sub>2</sub> Cl <sub>2</sub> -MeOH (1:2), 5) MeOH, 6) H <sub>2</sub> O, 7) H <sub>2</sub> O+0.4% AcOH | 38.1      | 22.6      | 17.2      | 29.1      | 14.7      | 19.0      | 19.2      |
| 5A      | 932.0                           | 1) EtOAc-MeOH (4:1), 2) EtOAc -MeOH (3:2), 3) EtOAc -MeOH (2:3), 4) EtOAc -MeOH (1:4), 5) MeOH                                                                                                                                                              | 61.4      | 41.9      | 33.6      | 14.4      | 13.0      | /         | /         |
| 5B      |                                 | 1) EtOAc -MeOH (3:2), 2) EtOAc -MeOH (2:3), 3) EtOAc-MeOH (1:4), 4) MeOH, 5) H <sub>2</sub> O, 6) H <sub>2</sub> O+0.4% AcOH                                                                                                                                | 274.2     | 73.8      | 52.4      | 6.6       | 6.6       | 43.9      | /         |

\* Not available due to accidental solvent bumping.

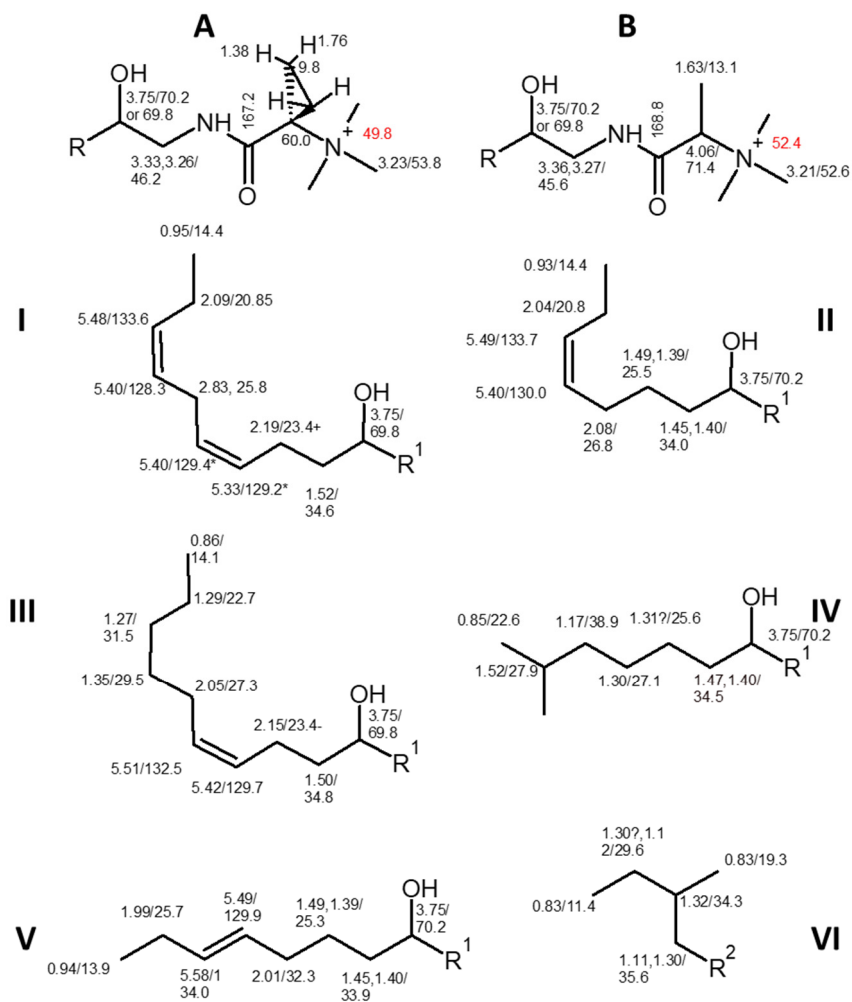

**Figure S2.** Assignments of  $^1\text{H}$ ,  $^{13}\text{C}$  and  $^{15}\text{N}$  (red) NMR signals in terminal ammonium groups (A and B) and alkyl chains (I-VI) derived by NMR analysis.

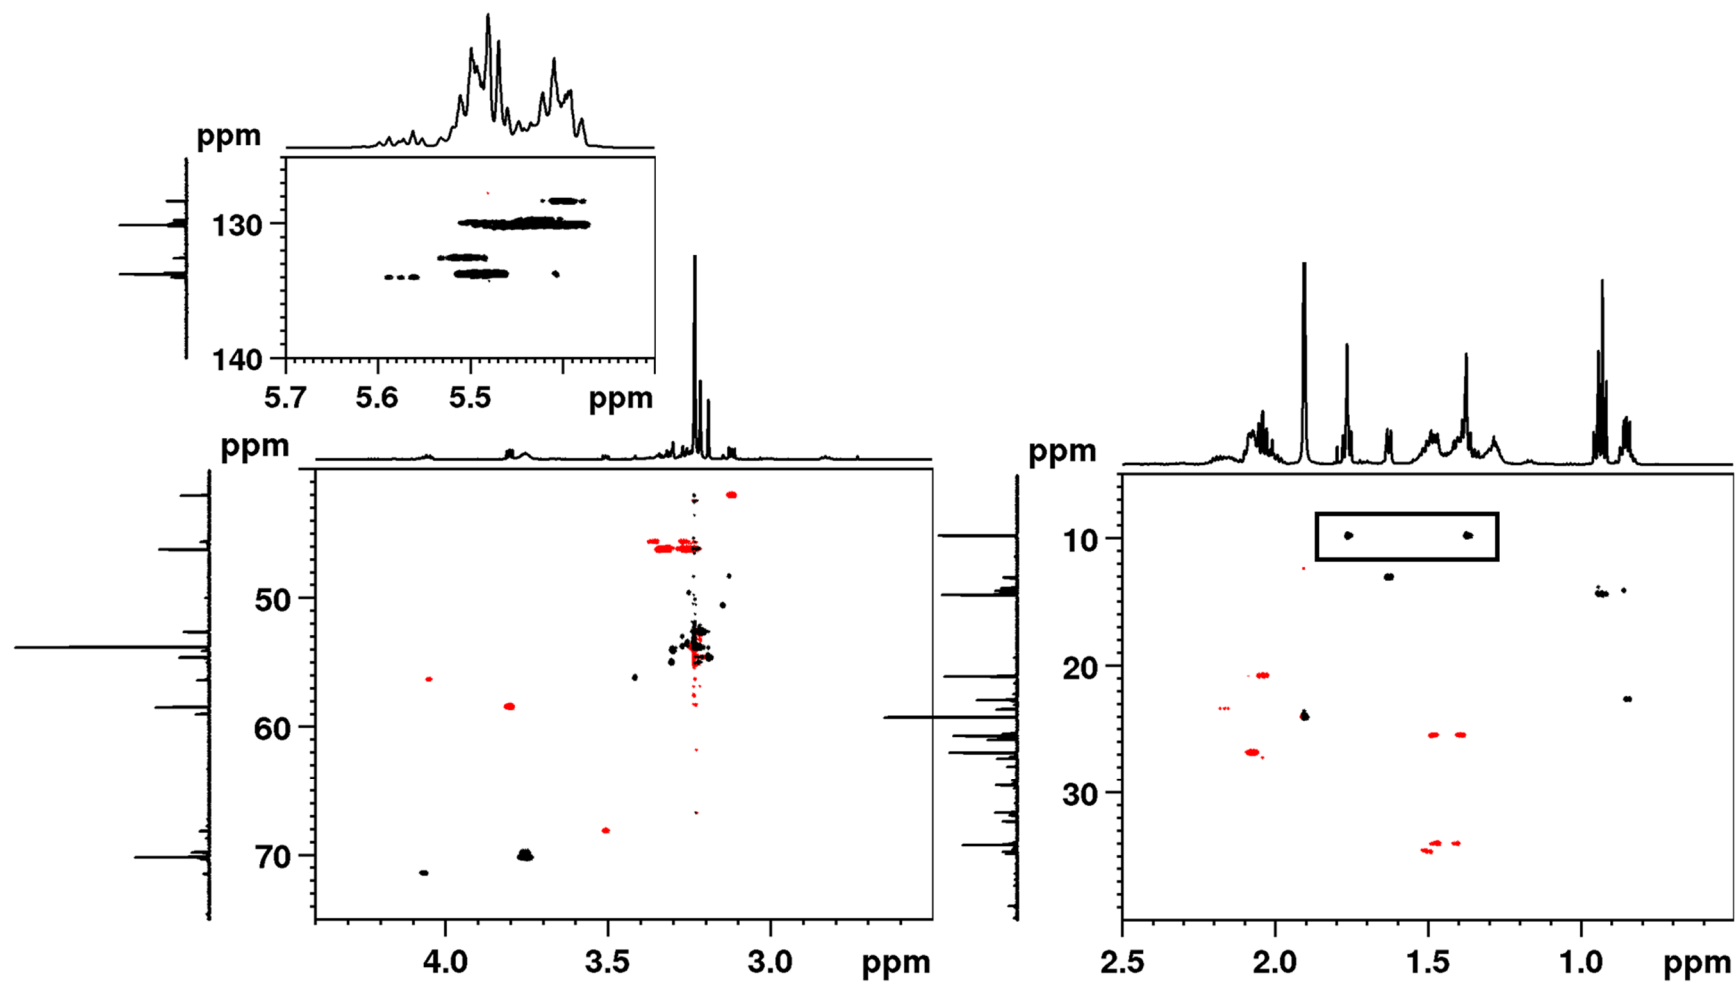

**Figure S3.** Enlarged regions of the  $^1\text{H}$ , $^{13}\text{C}$ -HSQC NMR spectrum. In the black rectangle, the correlation between the protons and the carbon of the cyclopropane ring, with the same sign of methyl and methyne correlations.



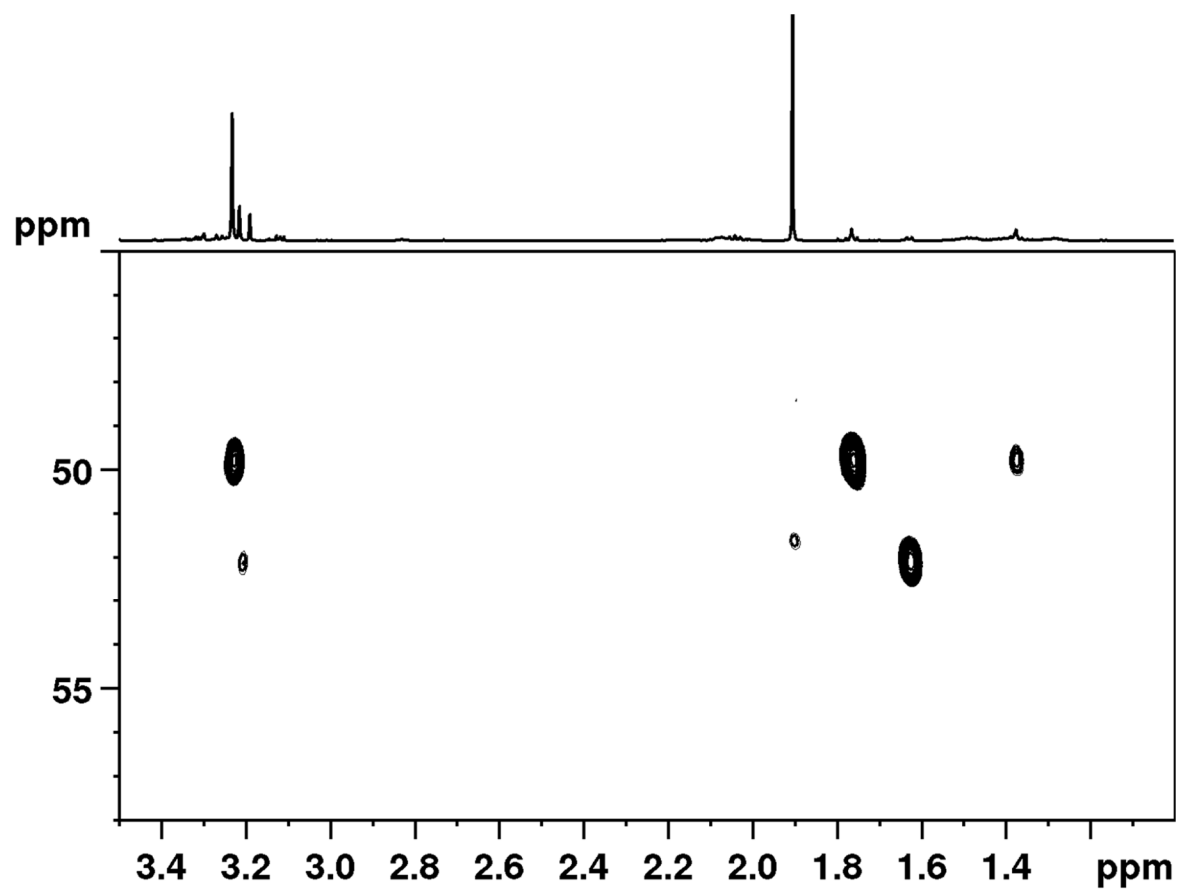

**Figure S4.** H,N-HSQC NMR spectrum of carunculines.

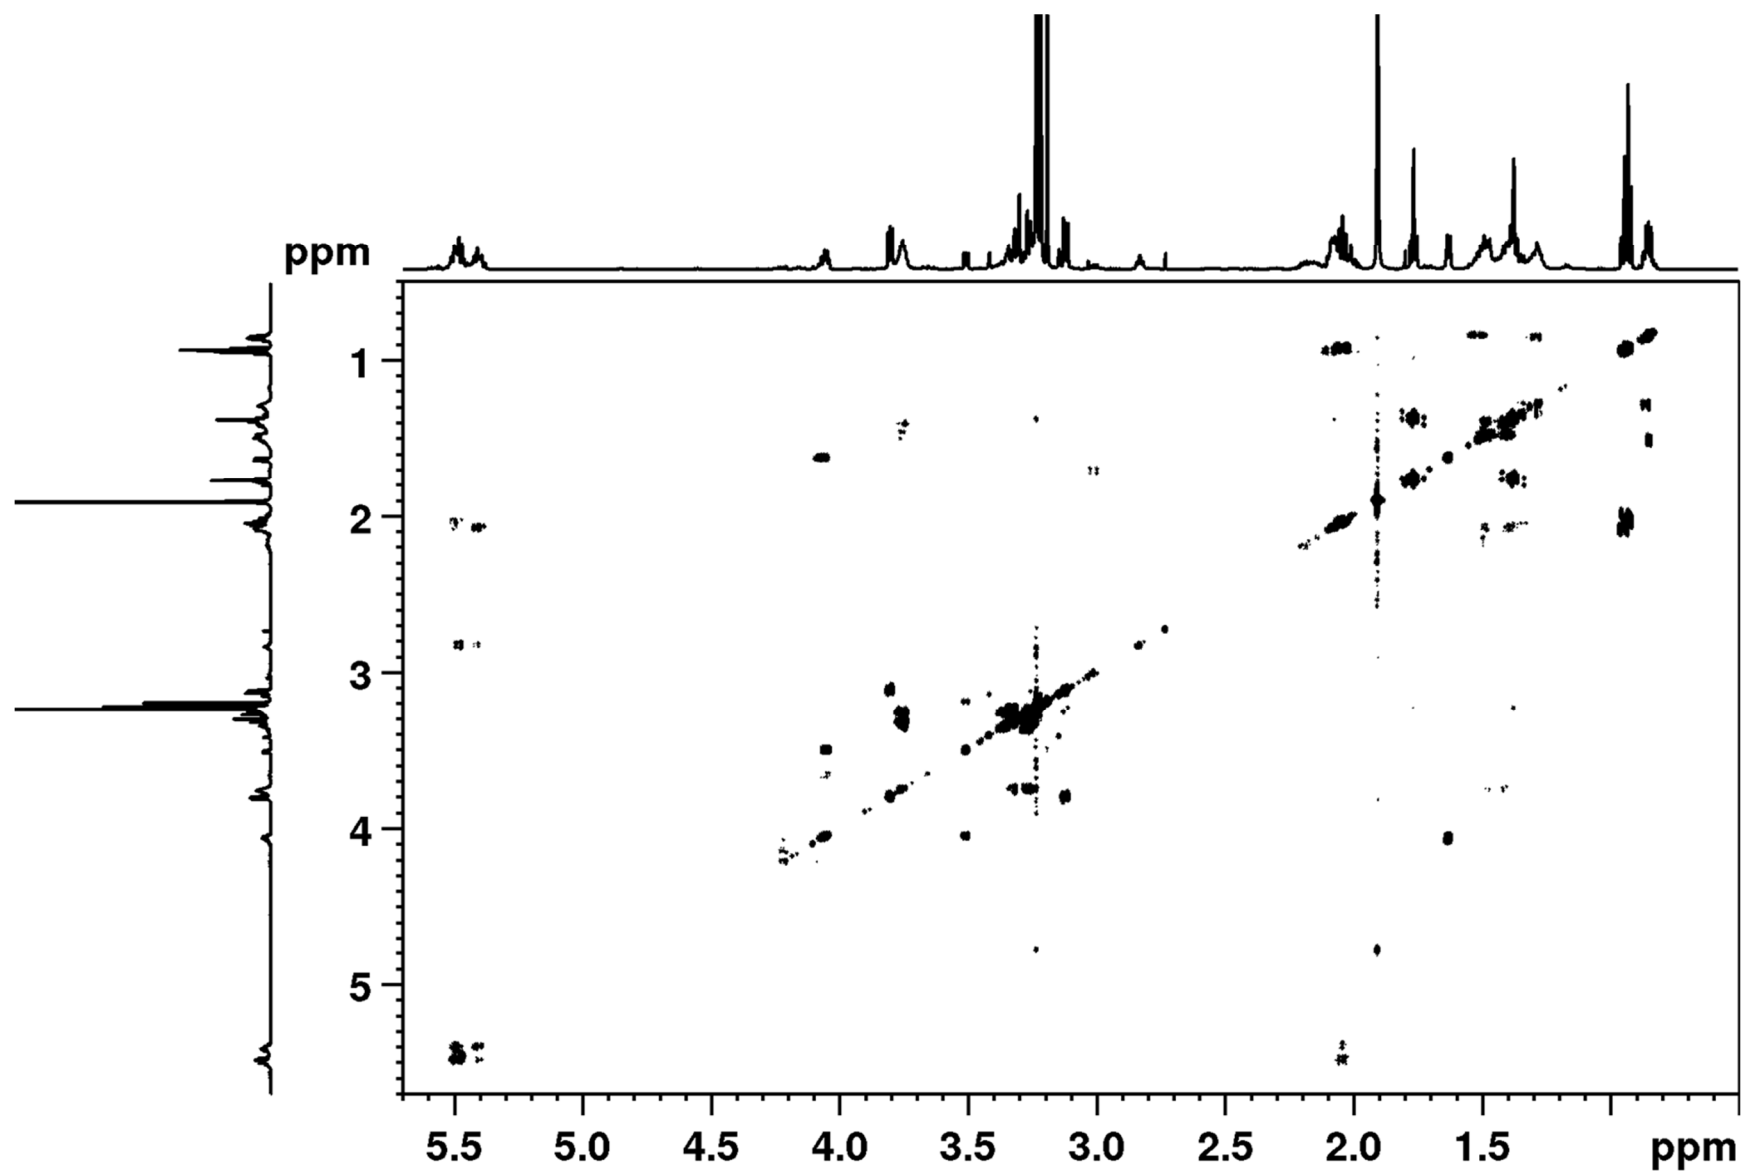

**Figure S5.**  $^1\text{H}$ - $^1\text{H}$ -COSY NMR spectrum of carunculines.

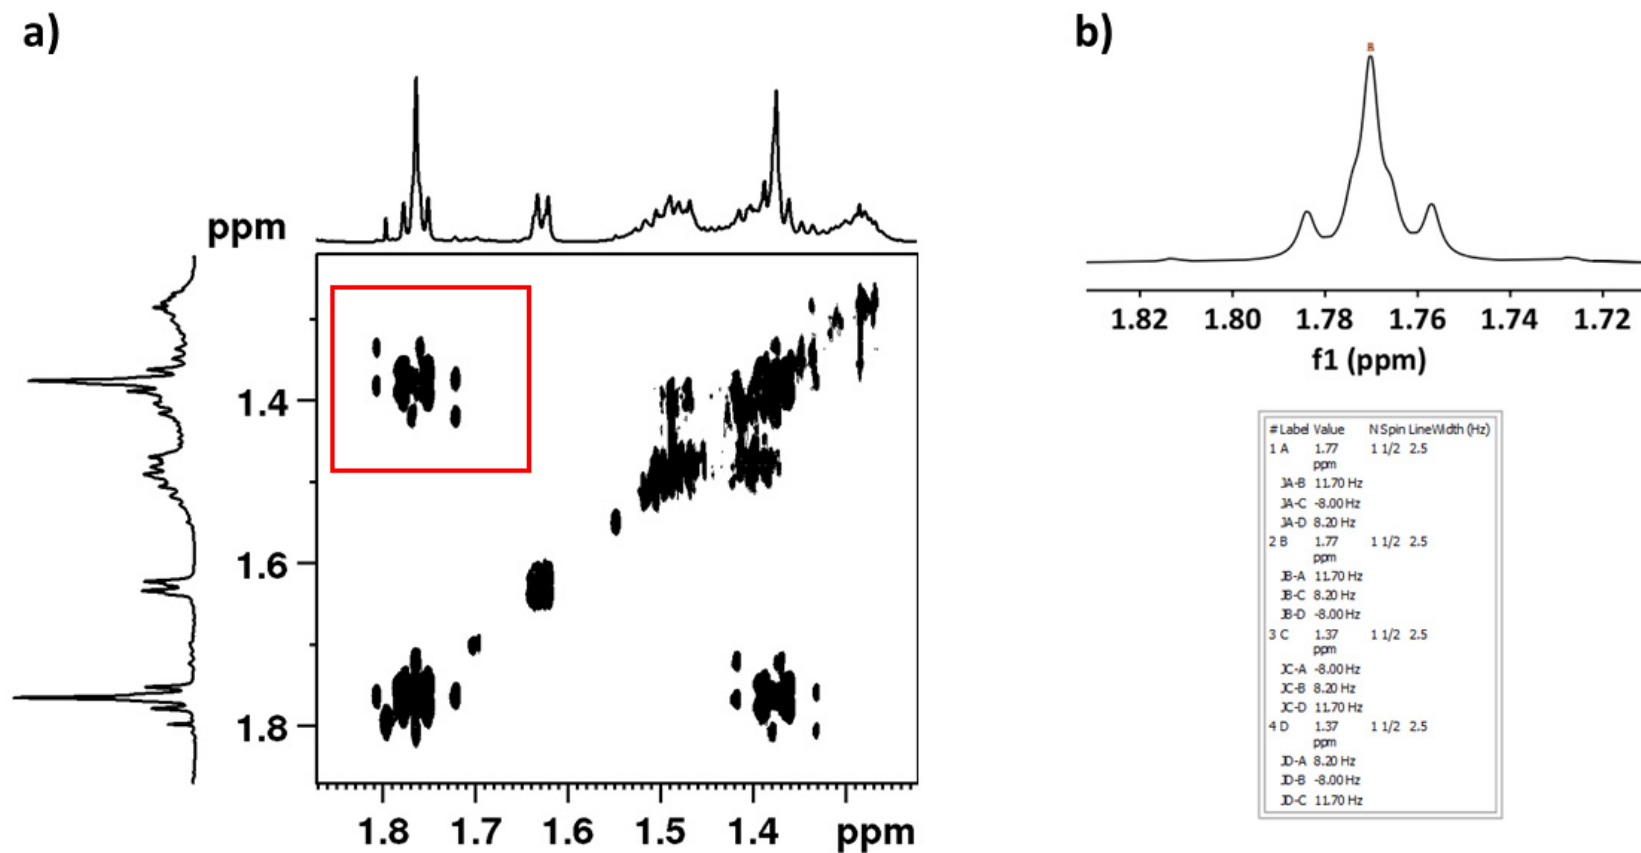

**Figure S5 (continue).** a) Enlarged region of the  $^1\text{H},^1\text{H}$ -COSY NMR spectrum of carunculines. The red square shows the correlation between the AA' and BB' protons of the cyclopropane ring. b) spin-system simulation showing the shape of one of the two multiplets of the AA'BB' system (MestReNova v 14.1.2-25024).

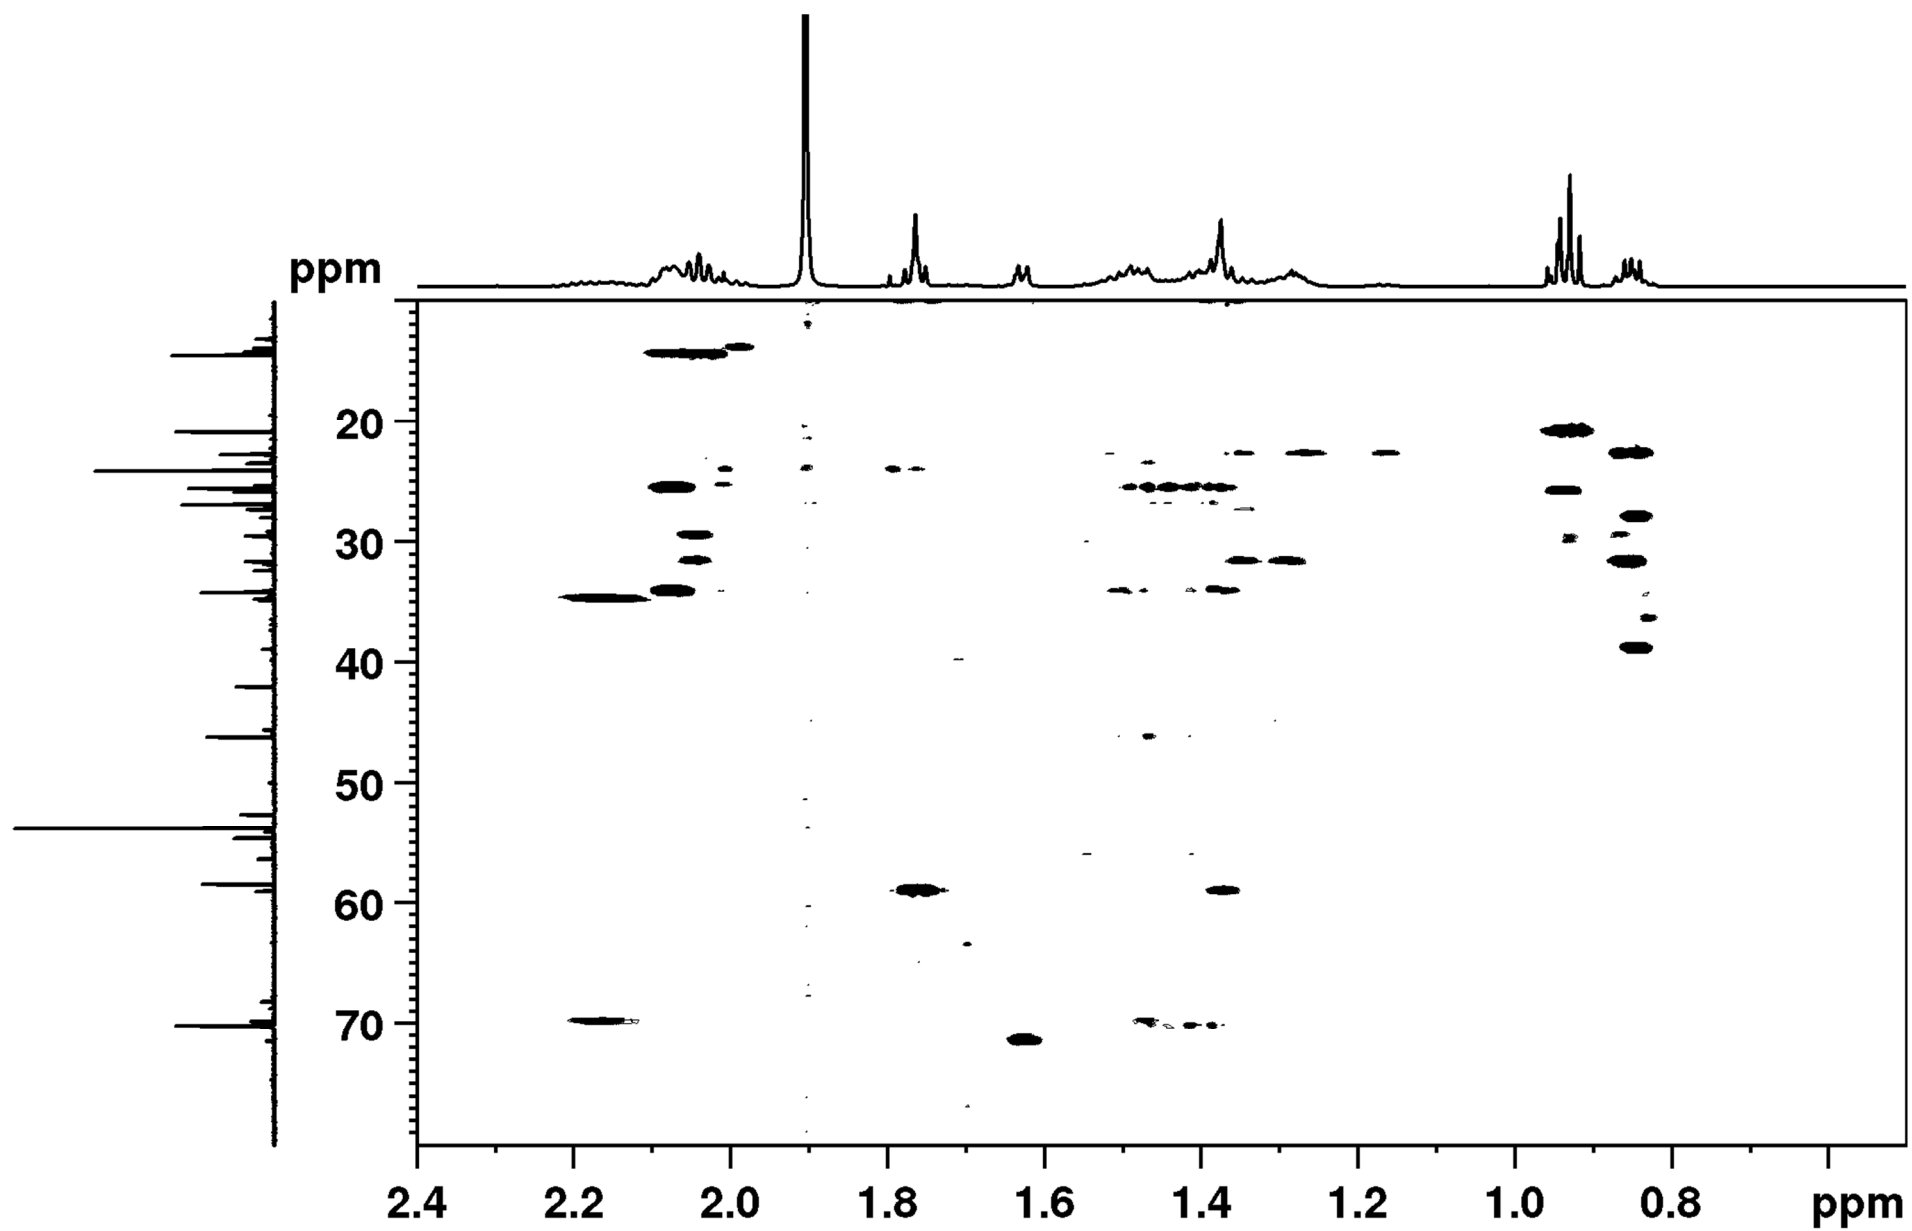

**Figure S6.** Partial  $^1\text{H}$ , $^{13}\text{C}$ -HMBC NMR spectrum of carunculines.

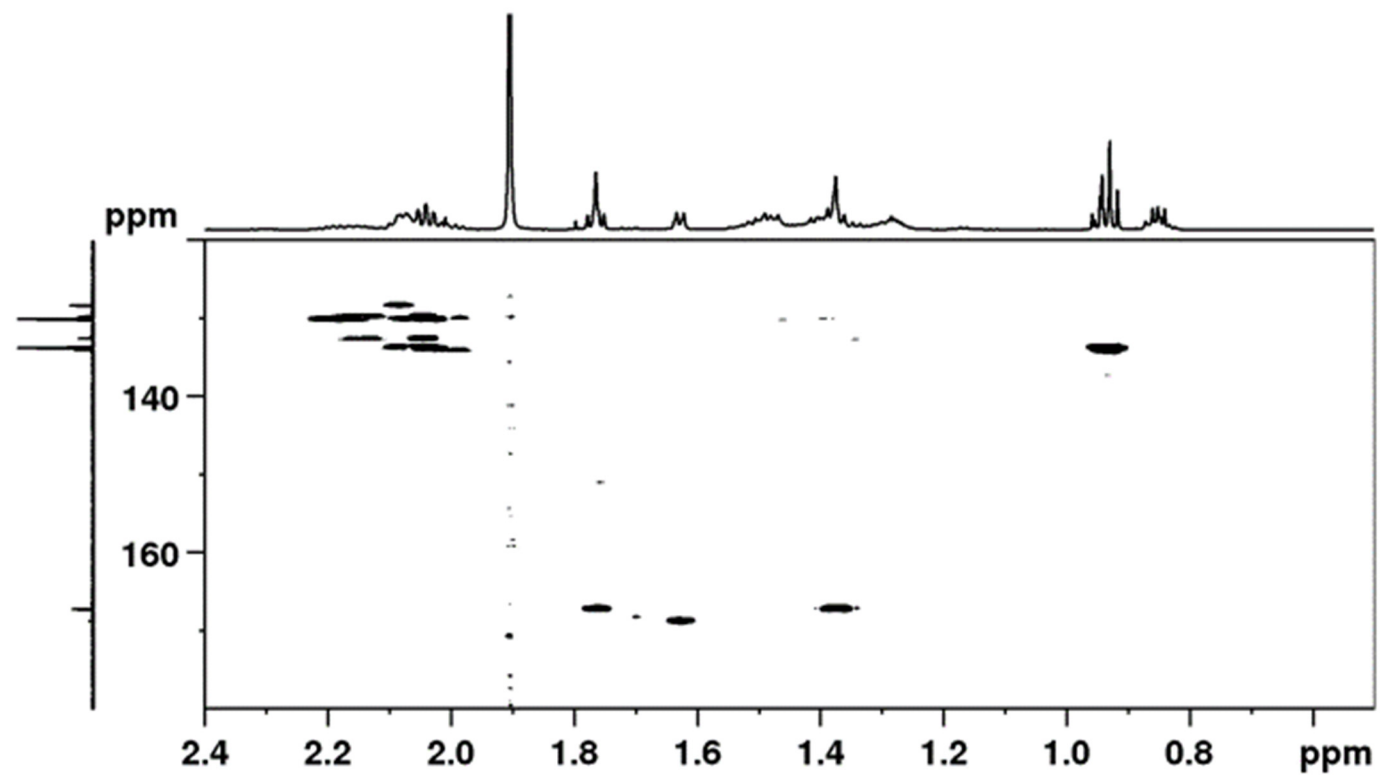

**Figure S6 (continue).** Partial  $^1\text{H}$ , $^{13}\text{C}$ -HMBC NMR spectrum of carunculines.

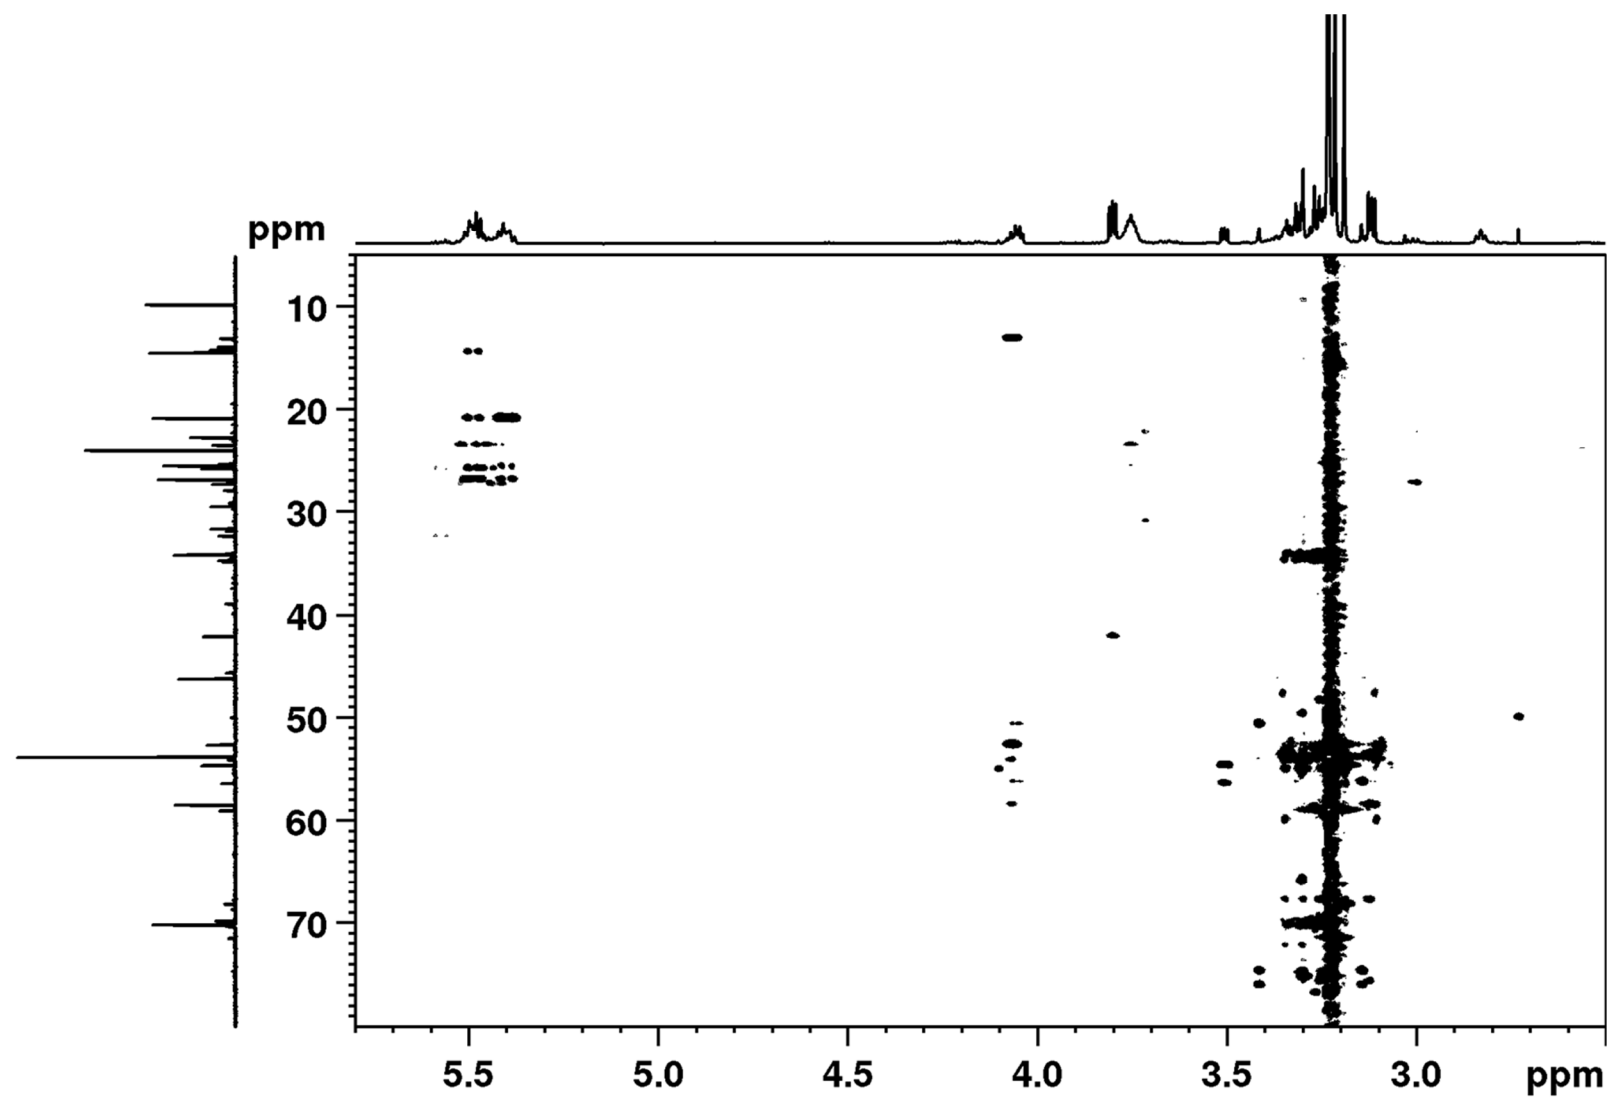

Figure S6 (continue). Partial  $^1\text{H}$ , $^{13}\text{C}$ -HMBC NMR spectrum of carunculines.

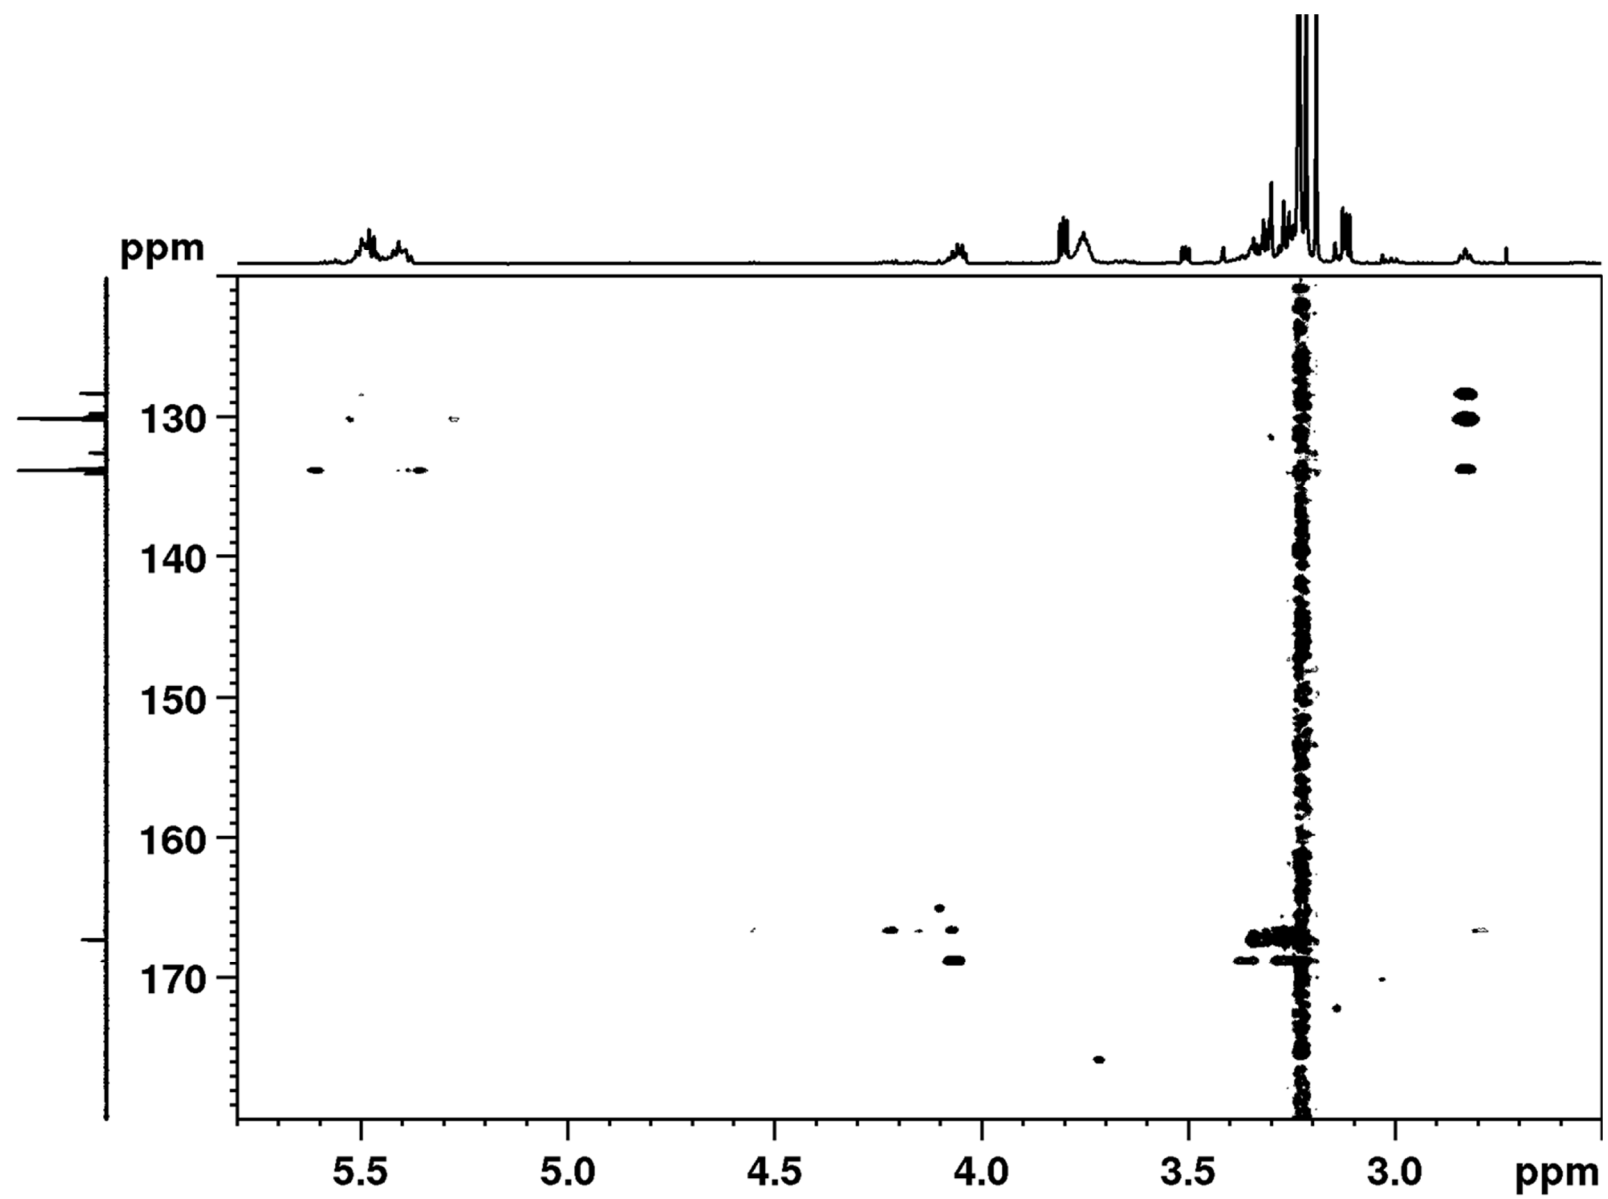

Figure S6 (continue). Partial  $^1\text{H}$ , $^{13}\text{C}$ -HMBC NMR spectrum of carunculines.

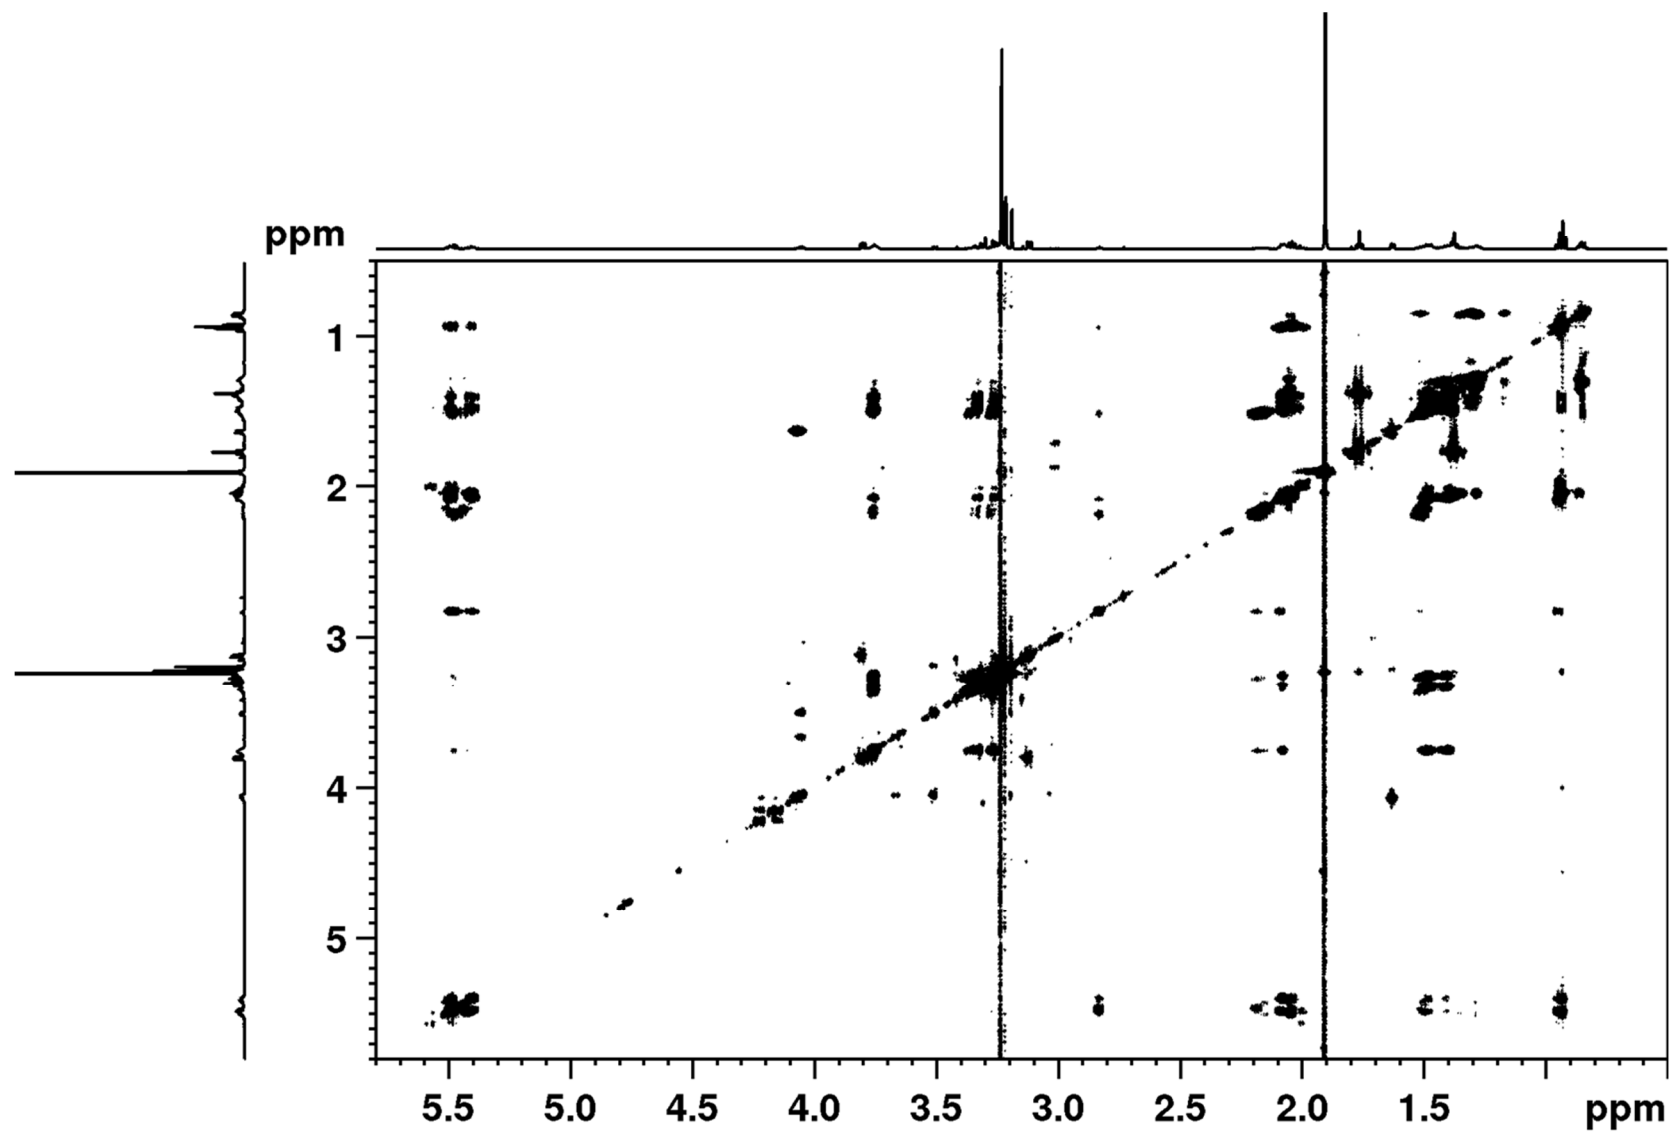

**Figure S7.** H,H-TOCSY NMR spectrum of carunculines.



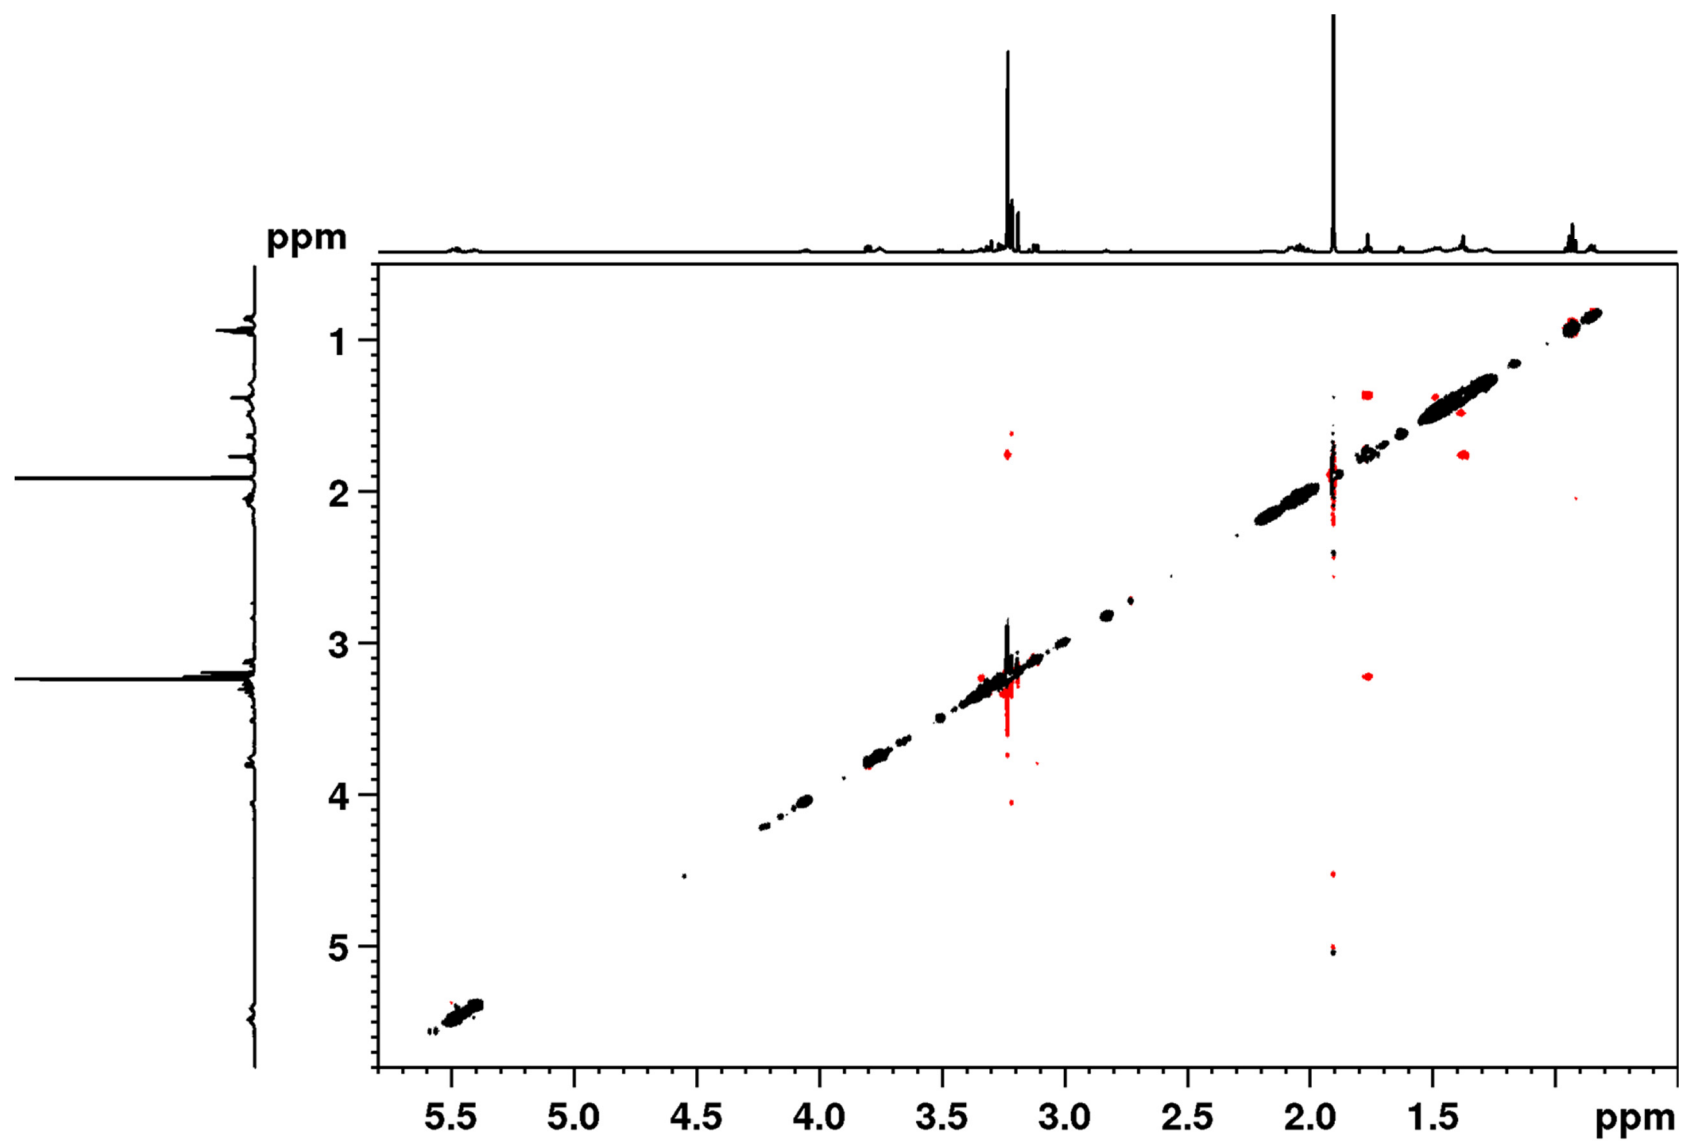

**Figure S8.** <sup>1</sup>H-<sup>1</sup>H-NOESY NMR spectrum of carunculines. It clearly shows that protons at 1.76 ppm are those closer to the trimethylammonium group in A.

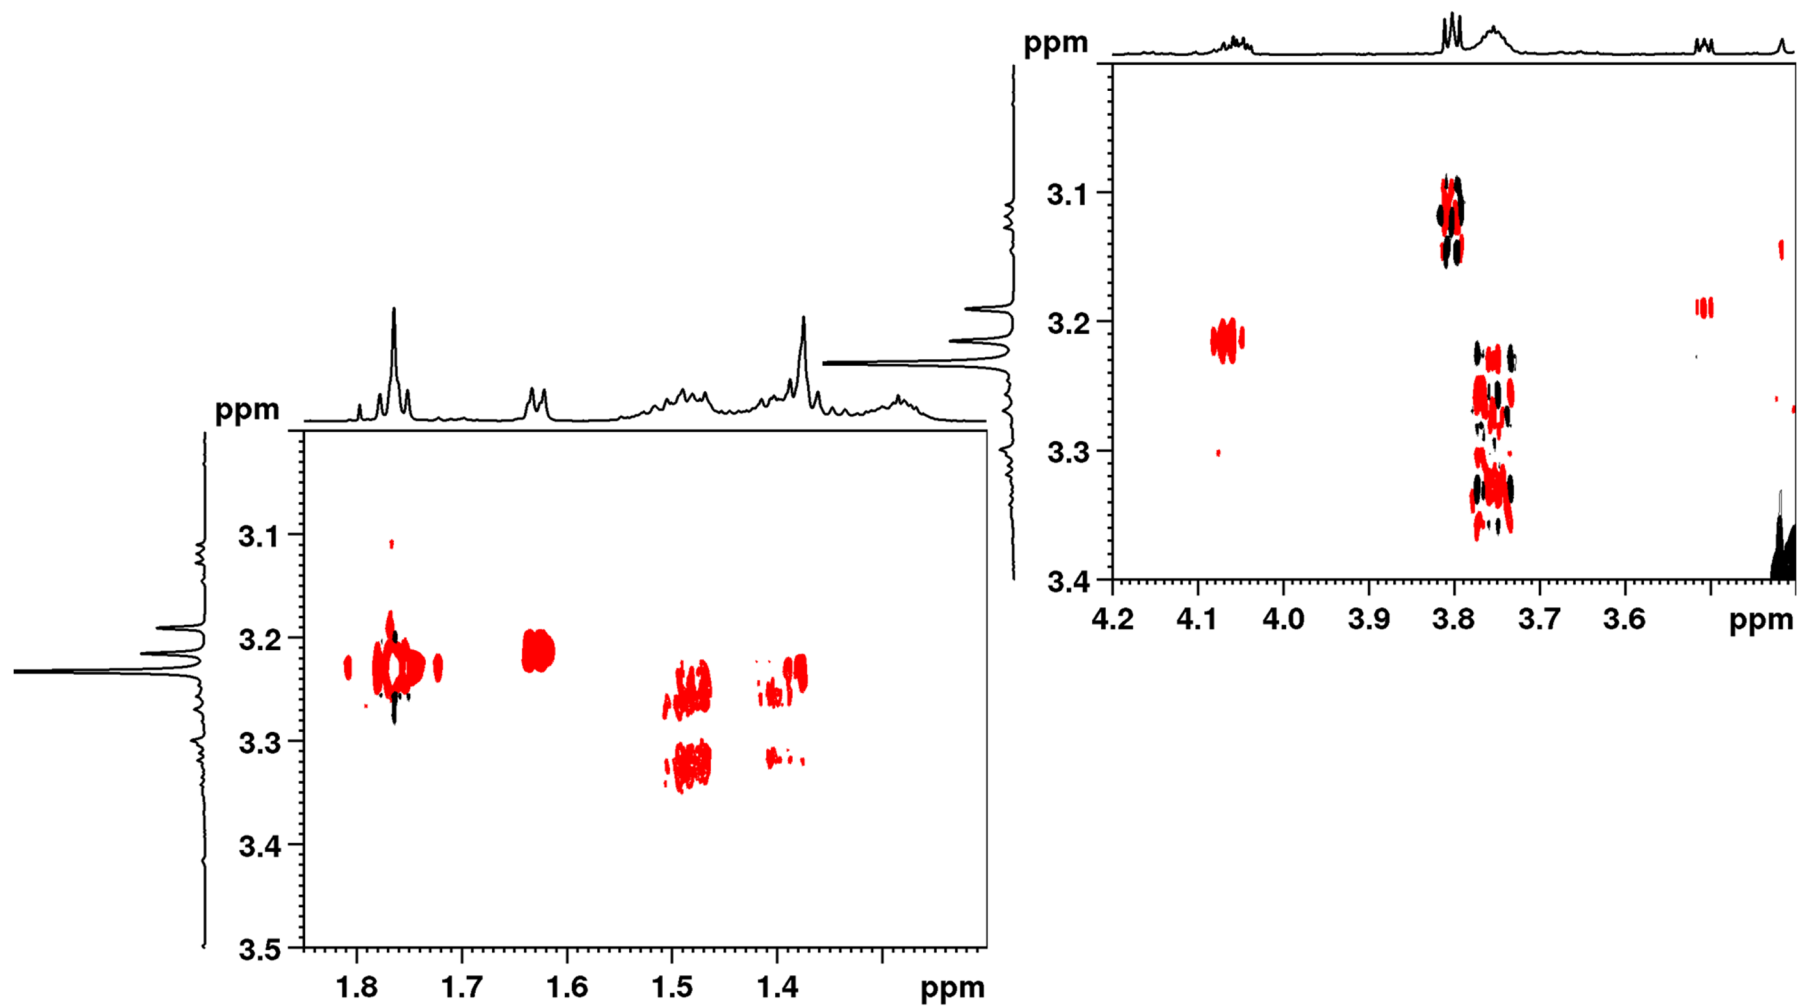

**Figure S8 (continue).** Enlarged regions of the <sup>1</sup>H-<sup>1</sup>H-NOESY NMR spectrum of carunculines. It clearly shows that protons at 1.76 ppm are those closer to the trimethylammonium group in A.

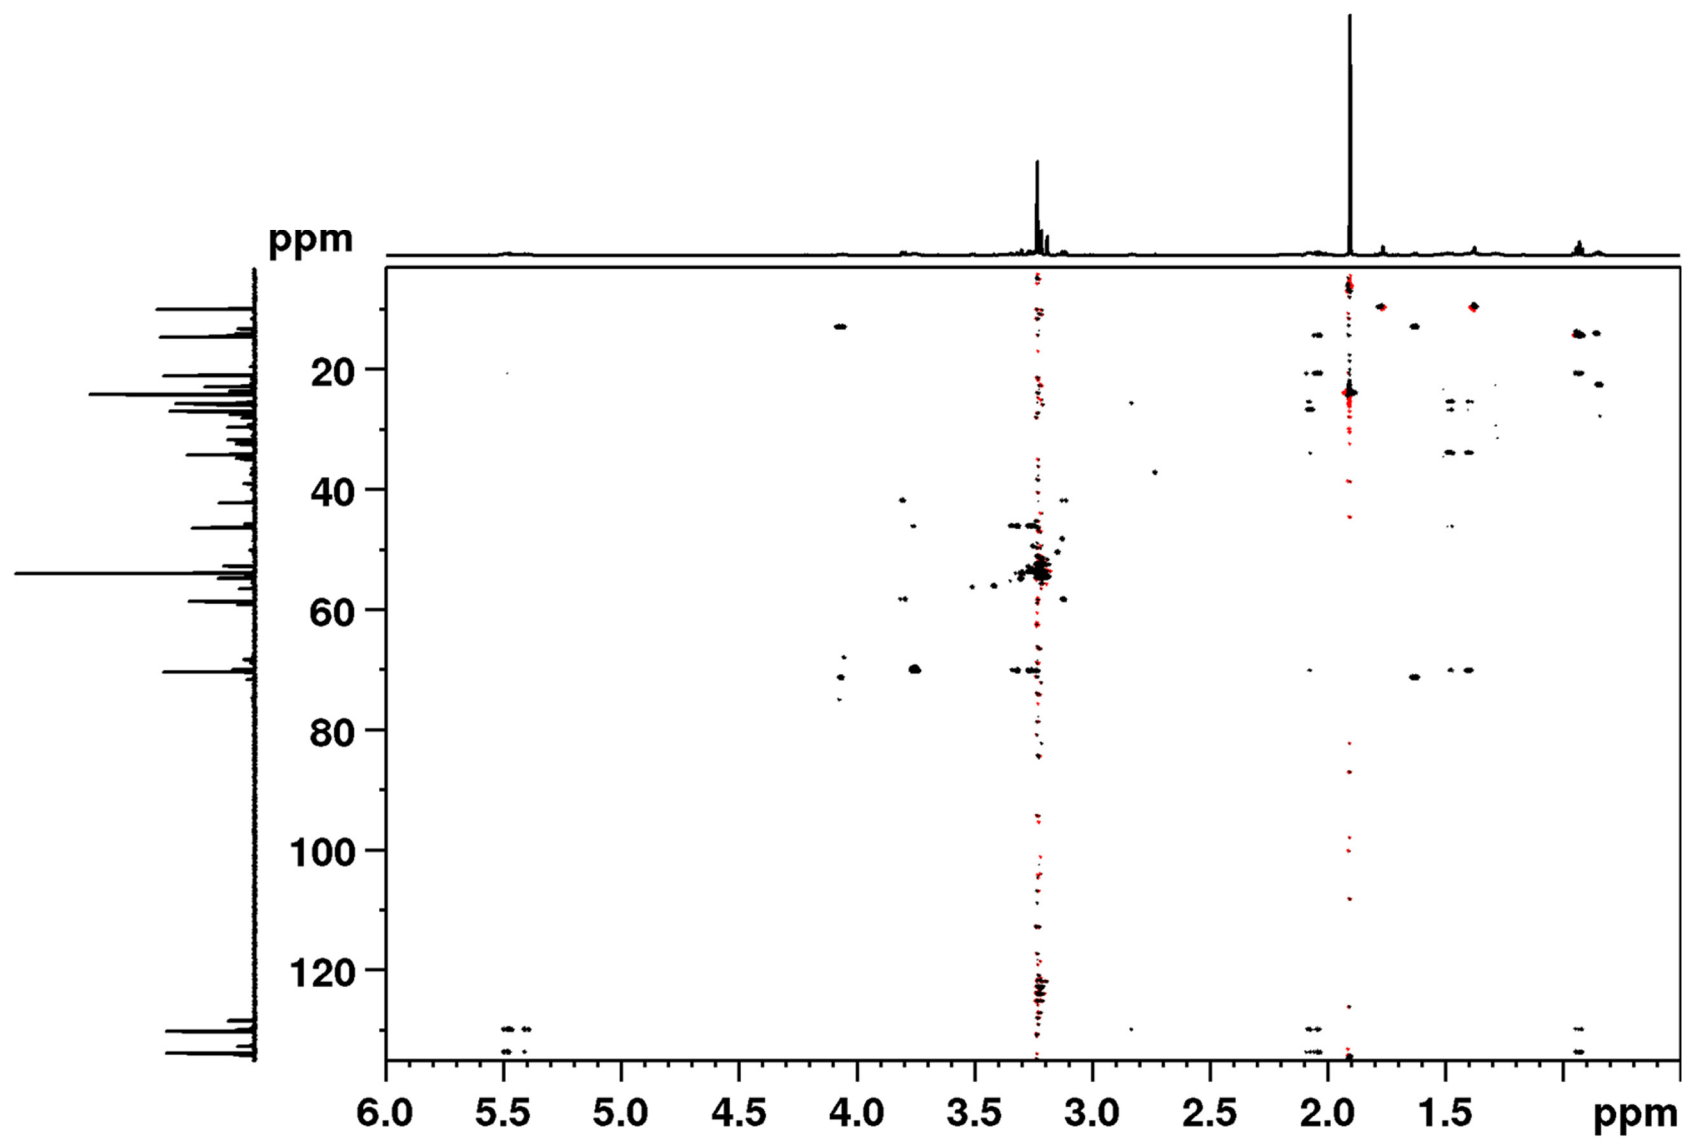

**Figure S9.**  $^1\text{H}$ , $^{13}\text{C}$ -HSQC-TOCSY NMR spectrum of carunculines.

**Table S2.** Relevant MS/MS fragments identified in carunculines (**1,3,5,8**) using HPLC-ESI/HRMS. Neutral loss (*m*) were obtained by difference between the *m/z* of each carunculine and the fragments. Hypothetical structures or formulae of the fragments lost were proposed.

| Terminal ammonium portion (A)           |                                   |                                         |                                   |                                         |                                   |                                         |                                   |                                                                                         |
|-----------------------------------------|-----------------------------------|-----------------------------------------|-----------------------------------|-----------------------------------------|-----------------------------------|-----------------------------------------|-----------------------------------|-----------------------------------------------------------------------------------------|
| Carunculine 1<br>( <i>m/z</i> 283.2377) |                                   | Carunculine 3<br>( <i>m/z</i> 285.2535) |                                   | Carunculine 5<br>( <i>m/z</i> 309.2535) |                                   | Carunculine 8<br>( <i>m/z</i> 311.2693) |                                   | Proposed<br>molecular<br>structure /<br>formula                                         |
| <i>MS/MS<br/>fragments</i>              |                                   | <i>MS/MS<br/>fragments</i>              |                                   | <i>MS/MS<br/>fragments</i>              |                                   | <i>MS/MS<br/>fragments</i>              |                                   |                                                                                         |
| 58.0659                                 |                                   | 58.0659                                 |                                   | 58.0659                                 |                                   | 58.0659                                 |                                   | CH <sub>2</sub> =N(CH <sub>3</sub> ) <sub>2</sub> <sup>+</sup>                          |
| 60.0815                                 |                                   | 60.0815                                 |                                   | 60.0815                                 |                                   | 60.0815                                 |                                   | NH(CH <sub>3</sub> ) <sub>3</sub> <sup>+</sup>                                          |
| 67.0549                                 |                                   | 67.0549                                 |                                   | 67.0549                                 |                                   | 67.0549                                 |                                   | C <sub>5</sub> H <sub>7</sub> <sup>+</sup>                                              |
| 84.0813                                 |                                   | 84.0813                                 |                                   | 84.0813                                 |                                   | 84.0813                                 |                                   | 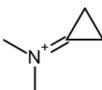     |
| 95.0859                                 |                                   | 95.0859                                 |                                   | 95.0859                                 |                                   | 95.0859                                 |                                   | C <sub>7</sub> H <sub>11</sub> <sup>+</sup>                                             |
| 98.0967                                 |                                   | 98.0967                                 |                                   | 98.0968                                 |                                   | 98.0967                                 |                                   |                                                                                         |
| 116.1071                                |                                   | 116.1071                                |                                   | 116.1071                                |                                   | 116.1071                                |                                   |     |
| 123.1168                                |                                   | 123.1168                                |                                   | /                                       |                                   | 123.1169                                |                                   | C <sub>9</sub> H <sub>15</sub> <sup>+</sup>                                             |
| 143.1177                                |                                   | 143.1178                                |                                   | 143.1178                                |                                   | 143.1178                                |                                   |    |
|                                         | <u>neutral<br/>loss, <i>m</i></u> |                                         | <u>neutral<br/>loss, <i>m</i></u> |                                         | <u>neutral<br/>loss, <i>m</i></u> |                                         | <u>neutral<br/>loss, <i>m</i></u> |                                                                                         |
| 170.1536                                | <u>113.084</u>                    | 172.1693                                | <u>113.084</u>                    | 196.1692                                | <u>113.0843</u>                   | 198.1850                                | <u>113.0843</u>                   | -  |
| 198.1850                                | <u>85.053</u>                     | 200.2006                                | <u>85.0529</u>                    | 224.2007                                | <u>85.0528</u>                    | 226.2163                                | <u>85.0530</u>                    | -  |
| 265.2270                                | <u>18.011</u>                     | 267.2426                                | <u>18.0107</u>                    | 291.2426                                | <u>18.0109</u>                    | 293.2582                                | <u>18.0111</u>                    | - H <sub>2</sub> O                                                                      |

\*tentative structure

**Table S3.** Relevant MS/MS fragments identified in carunculines (2,4,6,7) using HPLC-ESI/HRMS. Neutral losses (*m*) were obtained by difference between the *m/z* of each carunculine and the fragments. Hypothetical structures or formulae of the fragments lost were proposed.

| Terminal ammonium portion (B)           |                 |                                         |                 |                                         |                 |                                         |                 |                                                                                     |
|-----------------------------------------|-----------------|-----------------------------------------|-----------------|-----------------------------------------|-----------------|-----------------------------------------|-----------------|-------------------------------------------------------------------------------------|
| Carunculine 2<br>( <i>m/z</i> 271.2377) |                 | Carunculine 4<br>( <i>m/z</i> 273.2535) |                 | Carunculine 6<br>( <i>m/z</i> 297.2535) |                 | Carunculine 7<br>( <i>m/z</i> 299.2693) |                 | Proposed<br>molecular<br>structure /<br>formula                                     |
| <i>MS/MS<br/>fragments</i>              |                 | <i>MS/MS<br/>fragments</i>              |                 | <i>MS/MS<br/>fragments</i>              |                 | <i>MS/MS<br/>fragments</i>              |                 |                                                                                     |
| 58.0659                                 |                 | 58.0659                                 |                 | 58.0659                                 |                 | 58.0659                                 |                 | CH <sub>2</sub> =N(CH <sub>3</sub> ) <sub>2</sub> <sup>+</sup>                      |
| 60.0815                                 |                 | 60.0815                                 |                 | 60.0815                                 |                 | 60.0815                                 |                 | NH(CH <sub>3</sub> ) <sub>3</sub> <sup>+</sup>                                      |
| 67.0549                                 |                 | 67.0549                                 |                 | 67.0549                                 |                 | 67.0549                                 |                 | C <sub>5</sub> H <sub>7</sub> <sup>+</sup>                                          |
| 81.0704                                 |                 | 81.0704                                 |                 | 81.0704                                 |                 | 81.0704                                 |                 | C <sub>6</sub> H <sub>9</sub> <sup>+</sup>                                          |
| 95.0859                                 |                 | 95.0859                                 |                 | 95.0859                                 |                 | 95.0859                                 |                 | C <sub>7</sub> H <sub>11</sub> <sup>+</sup>                                         |
| 123.1168                                |                 | 123.1168                                |                 | 123.1170                                |                 | 123.1169                                |                 | C <sub>9</sub> H <sub>15</sub> <sup>+</sup>                                         |
| <u>neutral</u><br><u>loss, <i>m</i></u> |                 | <u>neutral</u><br><u>loss, <i>m</i></u> |                 | <u>neutral</u><br><u>loss, <i>m</i></u> |                 | <u>neutral</u><br><u>loss, <i>m</i></u> |                 |                                                                                     |
| 140.1432                                | <u>131.0945</u> | 142.1589                                | <u>131.0946</u> | 166.1591                                | <u>131.0944</u> | 168.1746                                | <u>131.0947</u> | 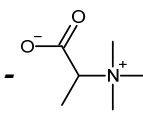 |
| 166.159                                 | <u>105.0787</u> | 168.1745                                | <u>105.079</u>  | 192.1741                                | <u>105.0794</u> | 194.1902                                | <u>105.0791</u> | - H <sub>2</sub> O -<br>N(CH <sub>3</sub> ) <sub>3</sub> - CO                       |
| 184.1694                                | <u>87.0683</u>  | 186.1851                                | <u>87.0684</u>  | 210.1848                                | <u>87.0687</u>  | 212.2007                                | <u>87.0686</u>  | - N(CH <sub>3</sub> ) <sub>3</sub> - CO                                             |
| 194.1539                                | <u>77.0838</u>  | 196.1694                                | <u>77.0841</u>  | 220.1649                                | <u>77.0886</u>  | 222.1851                                | <u>77.0842</u>  | - H <sub>2</sub> O -<br>N(CH <sub>3</sub> ) <sub>3</sub>                            |
| 253.2271                                | <u>18.0106</u>  | 255.2427                                | <u>18.0108</u>  | 279.2428                                | <u>18.0107</u>  | 281.2583                                | <u>18.0110</u>  | - H <sub>2</sub> O                                                                  |

**Table S4.** Carunculines (1–8) and their relative quantification in fireworm tissues based on peak area counts. The highest peak area value for each isomer was counted as 100% and the others were derived in proportion. DBW: Dorsal Body Wall; NO: notochaetae; NE: neurochaetae; PH: pharynx; GU: Gut; MS data: M<sup>+</sup>: theoretical monoisotopic mass; i: isomer; RT is recorded at the apex of the peak; overall area: sum of isomer area. All peak areas derived from ion chromatograms obtained from 1 mg/ml samples.

| Carunculines       |              | <i>H. carunculata</i> body parts |           |           |           |           |           |
|--------------------|--------------|----------------------------------|-----------|-----------|-----------|-----------|-----------|
|                    |              | DBW                              | NO        | NE        | PH        | GU        |           |
| 1<br>(M+ 283.2380) | i1           | Exact mass                       | 283.2380  | 283.2382  | 283.2382  | 283.2380  | 283.2379  |
|                    |              | Peak area                        | 50.61%    | 56.15%    | 59.12%    | 7.93%     | 100.00%   |
|                    |              | RT (min)                         | 4.34      | 4.35      | 4.36      | 4.35      | 4.36      |
|                    | i2           | Peak area                        | 35.56%    | 38.15%    | 36.81%    | 4.33%     | 100.00%   |
|                    |              | RT (min)                         | 4.50      | 4.50      | 4.50      | 4.51      | 4.49      |
|                    |              | Overall area                     | 47.20%    | 52.08%    | 54.16%    | 7.13%     | 100.00%   |
| 2<br>(M+ 271.2380) | i1           | Exact mass                       | 271.2381  | 271.2382  | 271.2381  | 271.2380  | 271.2379  |
|                    |              | Peak area                        | 38.57%    | 32.07%    | 39.41%    | 5.67%     | 100.00%   |
|                    |              | RT (min)                         | 4.41      | 4.42      | 4.42      | 4.41      | 4.42      |
|                    | i2           | Peak area                        | 35.40%    | 56.88%    | 100.00%   | 6.58%     | 97.82%    |
|                    |              | RT (min)                         | 4.30      | 4.30      | 4.31      | 4.31      | 4.30      |
|                    | i3           | Peak area                        | 32.47%    | 26.89%    | 28.69%    | 3.94%     | 100.00%   |
|                    |              | RT (min)                         | 4.54      | 4.53      | 4.54      | 4.53      | 4.54      |
|                    | i4           | Peak area                        | 21.60%    | 26.40%    | 36.60%    | 3.52%     | 100.00%   |
|                    |              | RT (min)                         | 4.13      | 4.14      | 4.14      | 4.13      | 4.14      |
|                    | Overall area | 34.81%                           | 34.81%    | 47.51%    | 5.28%     | 100.00%   |           |
| 3<br>(M+ 285.2536) | i1           | Exact mass                       | 285.2537  | 285.2539  | 285.2538  | 285.254   | 285.2536  |
|                    |              | Peak area                        | 44.67%    | 74.82%    | 90.63%    | 6.65%     | 100.00%   |
|                    |              | RT (min)                         | 5.11      | 5.11      | 5.11      | 5.10      | 5.10      |
|                    | i2           | Peak area                        | 29.87%    | 61.62%    | 100%      | 5.50%     | 71.57%    |
|                    |              | RT (min)                         | 5.24      | 5.24      | 5.24      | 5.24      | 5.24      |
|                    | i3           | Peak area                        | 30.05%    | 43.22%    | 60.49%    | 3.89%     | 100%      |
|                    |              | RT (min)                         | 5.01      | 5.01      | 5.02      | 5.01      | 5.02      |
|                    | Overall area | 38.46%                           | 70.57%    | 100.00%   | 6.28%     | 91.06%    |           |
| 4<br>(M+ 273.2535) | i1           | Exact mass                       | 273.25380 | 273.25390 | 273.25370 | 273.25370 | 273.25360 |
|                    |              | Peak area                        | 34.60%    | 52.78%    | 50.11%    | 4.85%     | 100.00%   |
|                    |              | RT (min)                         | 5.15      | 5.15      | 5.16      | 5.15      | 5.15      |
|                    | i2           | Peak area                        | 31.83%    | 61.80%    | 44.57%    | 4.21%     | 100.00%   |
|                    |              | RT (min)                         | 5.07      | 5.06      | 5.07      | 5.07      | 5.06      |
|                    | i3           | Peak area                        | 31.54%    | 41.91%    | 56.54%    | 5.51%     | 100.00%   |
|                    |              | RT (min)                         | 5.25      | 5.28      | 5.29      | 5.29      | 5.29      |
|                    | Overall area | 33.07%                           | 50.39%    | 51.42%    | 4.99%     | 100.00%   |           |
| 5<br>(M+ 309.2536) |              | Exact mass                       | 309.25380 | 309.25410 | 309.25370 | 309.25380 | 309.25360 |
|                    |              | Peak area                        | 49.29%    | 82.56%    | 100.00%   | 7.34%     | 63.29%    |
|                    |              | RT (min)                         | 5.11      | 5.11      | 5.11      | 5.10      | 5.10      |
| 6<br>(M+ 297.2535) | i1           | Exact mass                       | 297.25360 | 297.25390 | 297.25370 | 297.25380 | 297.25380 |
|                    |              | Peak area                        | 26.01%    | 35.18%    | 70.83%    | 3.17%     | 100.00%   |
|                    |              | RT (min)                         | 5.49      | 5.49      | 5.49      | 5.49      | 5.49      |
|                    | i2           | Peak area                        | 25.83%    | 42.50%    | 85.42%    | 3.45%     | 100.00%   |
|                    |              | RT (min)                         | 5.35      | 5.35      | 5.34      | 5.35      | 5.34      |
|                    | Overall area | 25.99%                           | 36.09%    | 72.40%    | 3.21%     | 100.00%   |           |
| 7<br>(M+ 299.2693) | i1           | Exact mass                       | 299.2693  | 299.2695  | 299.2693  | 299.2695  | 299.2693  |
|                    |              | Peak area                        | 30.84%    | 100.00%   | 92.53%    | 4.82%     | 100%      |
|                    |              | RT (min)                         | 5.84      | 5.84      | 5.85      | 5.85      | 5.83      |
|                    | i2           | Peak area                        | 29.50%    | 100%      | 96.27%    | 4.04%     | 95.65%    |
|                    |              | RT (min)                         | 5.91      | 5.91      | 5.91      | 5.92      | 5.91      |
|                    | i3           | Peak area                        | 2.88%     | 5.95%     | 6.57%     | 0.46%     | 100%      |
|                    |              | RT (min)                         | 6.17      | 6.16      | 6.16      | 6.17      | 6.17      |
|                    | Overall area | 5.15%                            | 13.69%    | 13.74%    | 0.80%     | 100.00%   |           |

|                    |            |          |          |          |          |          |
|--------------------|------------|----------|----------|----------|----------|----------|
| 8<br>(M+ 311.2693) | Exact mass | 311.2693 | 311.2693 | 311.2692 | 311.2694 | 311.2691 |
|                    | Peak area  | 44.15%   | 61.13%   | 96.23%   | 7.37%    | 100.00%  |
|                    | RT (min)   | 6.12     | 6.12     | 6.14     | 6.13     | 6.12     |

**Table S5.** Carunculines (1–8) and their relative quantification in marine invertebrates based on peak area counts. The highest peak area value for each isomer was counted as 100% and the others were derived in proportion. *A. vir*: *Anemonia viridis*; *Eise*: *Eisenia* sp.; *Peri.*: *Perinereis* sp.; *S. spa*: *Sabella spallanzanii*; *Sipu.*: *Sipunculus* sp.; *H. car*: *Hermodice carunculata*. MS data: M<sup>+</sup>: theoretical monoisotopic mass; i: isomer; RT is recorded at the apex of the peak; overall area: sum of isomer area. All peak areas derived from ion chromatograms obtained from 1 mg/ml samples.

| Carunculines       |    | Marine invertebrates |                  |                  |                 |                  |               |
|--------------------|----|----------------------|------------------|------------------|-----------------|------------------|---------------|
|                    |    | <i>A. vir</i>        | <i>Eise. sp.</i> | <i>Peri. sp.</i> | <i>S. spa</i>   | <i>Sipu. sp.</i> | <i>H. car</i> |
| 1<br>(M+ 283.2380) | i1 | Exact mass           | 283.2382         | 283.2382         | 283.2379        | 283.2383         | 283.2380      |
|                    |    | Peak area            | 0.03%            | 0.18%            | 0.01%           | 0.17%            | 100.00%       |
|                    |    | RT (min)             | 4.37             | 4.59             | 4.37            | 4.37             | 4.28          |
|                    | i2 | Peak area            | 0.03%            | 0.09%            | 0.01%           | 0.08%            | 100.00%       |
|                    |    | RT (min)             | 4.50             | 4.75             | 4.50            | 4.46             | 4.48          |
|                    |    | Overall area         | 0.03%            | 0.17%            | 0.01%           | 0.16%            | 100.00%       |
| 2<br>(M+ 271.2380) | i1 | Exact mass           | 271.2381         | 271.2382         | 271.2379        | 271.2384         | 271.2377      |
|                    |    | Peak area            | 0.04%            | 0.18%            | 0.02%           | 0.10%            | 100.00%       |
|                    |    | RT (min)             | 4.42             | 4.65             | 4.43            | 4.43             | 4.44          |
|                    | i2 | Peak area            | 0.09%            | 0.23%            | 0.02%           | 0.13%            | 100.00%       |
|                    |    | RT (min)             | 4.32             | 4.55             | 4.31            | 4.31             | 4.32          |
|                    | i3 | Peak area            | 0.04%            | 0.11%            | 0.01%           | 0.06%            | 100.00%       |
|                    |    | RT (min)             | 4.58             | 4.81             | 4.58            | 4.53             | 4.56          |
|                    | i4 | Peak area            | 0.02%            | 0.08%            | 0.03%           | 0.06%            | 100.00%       |
|                    |    | RT (min)             | 4.15             | 4.38             | 4.19            | 4.14             | 4.15          |
|                    |    | Overall area         | 0.04%            | 0.16%            | 0.02%           | 0.09%            | 100.00%       |
| 3<br>(M+ 285.2536) | i1 | Exact mass           | 285.2535         | 285.2539         | 285.2534        | 285.2541         | 285.2538      |
|                    |    | Peak area            | 0.05%            | 0.13%            | 0.02%           | 0.11%            | 100.00%       |
|                    |    | RT (min)             | 5.11             | 5.30             | 5.12            | 5.12             | 5.12          |
|                    | i2 | Peak area            | 0.04%            | 0.12%            | 0.13%           | 0.12%            | 100.00%       |
|                    |    | RT (min)             | 5.25             | 5.43             | 5.25            | 5.26             | 5.25          |
|                    | i3 | Peak area            | 0.03%            | 0.07%            | 0.01%           | 0.06%            | 100.00%       |
|                    |    | RT (min)             | 5.02             | 5.22             | 5.04            | 5.01             | 5.01          |
|                    |    | Overall area         | 0.04%            | 0.12%            | 0.01%           | 0.11%            | 100.00%       |
| 4<br>(M+ 273.2535) | i1 | Exact mass           | 273.2537         | 273.2540         | 273.2533        | 273.2540         | 273.2538      |
|                    |    | Peak area            | 0.07%            | 0.15%            | 0.01%           | 0.09%            | 100.00%       |
|                    |    | RT (min)             | 5.16             | 5.34             | 5.16            | 5.16             | 5.14          |
|                    | i2 | Peak area            | 0.00%            | 0.00%            | NF <sup>1</sup> | 0.00%            | 100.00%       |
|                    |    | RT (min)             | 5.08             | 5.28             | /               | 5.07             | 5.05          |
|                    | i3 | Peak area            | 0.07%            | 0.16%            | 0.02%           | 0.10%            | 100.00%       |
|                    |    | RT (min)             | 5.29             | 5.49             | 5.30            | 5.30             | 5.28          |
|                    |    | Overall area         | 0.05%            | 0.12%            | 0.01%           | 0.09%            | 100.00%       |
| 5<br>(M+ 309.2536) |    | Exact mass           | 309.2536         | 309.2539         | 309.2534        | 309.2540         | 309.2535      |
|                    |    | Peak area            | 0.05%            | 0.13%            | 0.02%           | 0.11%            | 100.00%       |
|                    |    | RT (min)             | 5.11             | 5.30             | 5.12            | 5.12             | 5.12          |
| 6<br>(M+ 297.2535) | i1 | Exact mass           | 297.2539         | 297.2538         | 297.2536        | 297.2541         | 297.2536      |
|                    |    | Peak area            | 0.08%            | 0.26%            | 0.03%           | 0.16%            | 100.00%       |
|                    |    | RT (min)             | 5.49             | 5.67             | 5.50            | 5.50             | 5.48          |
|                    | i2 | Peak area            | 0.01%            | 0.02%            | NF <sup>1</sup> | 0.02%            | 100.00%       |
|                    |    | RT (min)             | 5.32             | 5.53             | /               | 5.36             | 5.35          |
|                    |    | Overall area         | 0.01%            | 0.04%            | 0.00%           | 0.03%            | 100.00%       |
| 7                  |    | Exact mass           | 299.2694         | 299.2695         | 299.2691        | 299.2698         | 299.2694      |

|                    |            |              |          |          |          |          |          |          |
|--------------------|------------|--------------|----------|----------|----------|----------|----------|----------|
| (M+ 299.2693)      | i1         | Peak area    | 0.06%    | 0.11%    | 0.01%    | 0.17%    | 1.15%    | 100.00%  |
|                    |            | RT (min)     | 5.85     | 5.99     | 5.85     | 5.84     | 5.86     | 5.82     |
|                    | i2         | Peak area    | 0.09%    | 0.19%    | 0.03%    | 0.22%    | 1.45%    | 100.00%  |
|                    |            | RT (min)     | 5.92     | 6.07     | 5.94     | 5.92     | 5.93     | 5.91     |
|                    | i3         | Peak area    | 0.08%    | 0.18%    | 0.03%    | 0.32%    | 100%     | 100.00%  |
|                    |            | RT (min)     | 6.17     | 6.30     | 6.18     | 6.18     | 6.16     | 6.13     |
|                    |            | Overall area | 0.07%    | 0.16%    | 0.02%    | 0.25%    | 1.28%    | 100.00%  |
| 8<br>(M+ 311.2693) | Exact mass |              | 311.2693 | 311.2693 | 311.2690 | 311.2697 | 311.2692 | 311.2693 |
|                    | Peak area  |              | 0.07%    | 0.17%    | 0.02%    | 0.36%    | 1.74%    | 100.00%  |
|                    | RT (min)   |              | 6.12     | 6.27     | 6.13     | 6.14     | 6.13     | 6.07     |

<sup>1</sup>H Not Found.

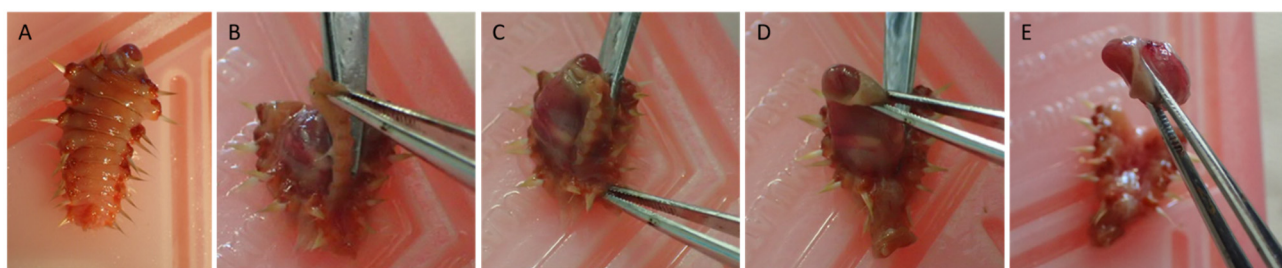

**Figure S10 (A-E).** Dissection of the pharynx. With a pair of sharp scissors, carefully make a cut at about chaetiger 15 on an anesthetized fireworm to remove the head including the whole pharynx. Place the head on an ice pack (A). With a pair of tweezers grab the dorsal body wall of the head in correspondence of the beheading cut. Using sharp scissors, cut laterally through the dorsal body wall on each side of the fireworm head toward the peristomium (A-C). Resect the two sets of dorsal and ventral muscles attached to the anterior and posterior portion of the pharynx until the mouth (D). Complete the dissection of the pharynx by cutting the buccal cavity close to the mouth (E). Transfer the pharynx in a glass bowl. Cover with parafilm and store at -18 °C.



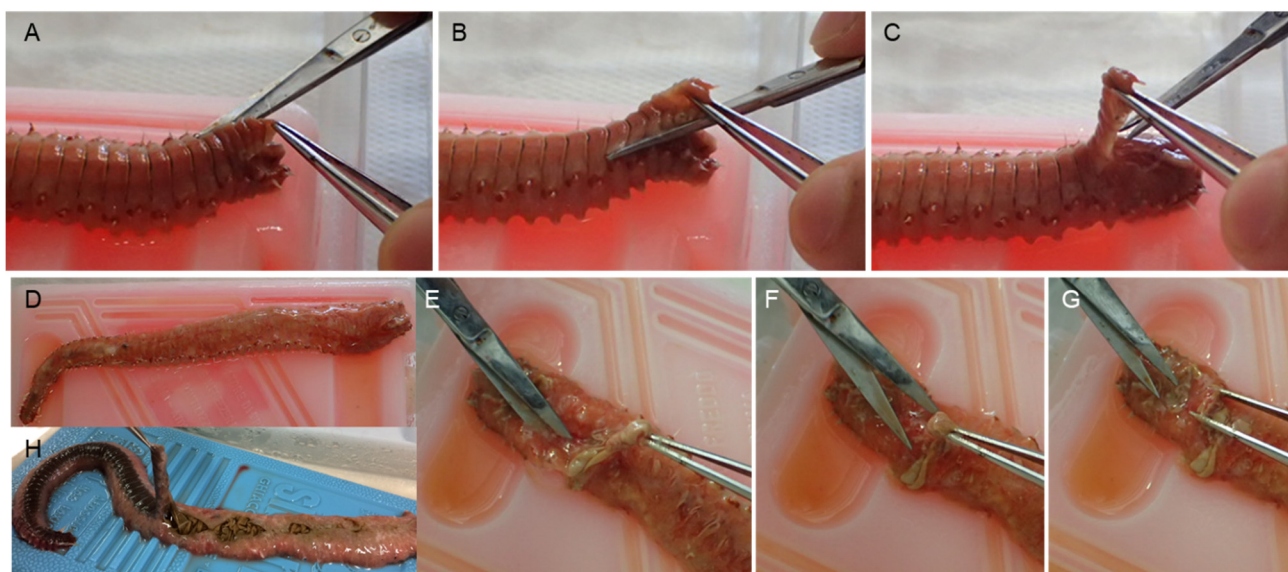

**Figure S11 (A-H).** Dissection of the dorsal body wall and gut. 6) With a pair of tweezers grab the dorsal body wall in correspondence of the beheading cut (A). Using sharp scissors, cut laterally through the dorsal body wall on each side of the fireworm up to the last 10-15 chaetigers (A-C). Once removed the dorsal body wall (D), grab the gut with tweezers starting from anterior portion of the body and pick it up to separate from the ventral body wall, using scissors if necessary (E-H). Dry the fragments on absorbent paper and transfer into a glass bowl. Cover with Parafilm and store at  $-18^{\circ}\text{C}$ .

**Table S6.** Weight of the freeze-dried samples and acetone extracts obtained from the body parts of *H. carunculata* and from the marine invertebrate taxa examined.

| Sample                                       | Freeze-dried (mg) | Extract (mg) |
|----------------------------------------------|-------------------|--------------|
| <b>Tissues of <i>H. carunculata</i></b>      |                   |              |
| Dorsal body wall                             | 330.8             | 7.9          |
| Notochaetae                                  | 1035.9            | 17.0         |
| Neurochaetae                                 | 310.2             | 14.0         |
| Pharynx                                      | 659.3             | 6.90         |
| Gut                                          | 4144.6            | 1172         |
| <b>Marine invertebrate sources</b>           |                   |              |
| <i>Hermodice carunculata</i> (Annelida)      | 6860.0            | 106.0        |
| <i>Sipunculus</i> sp. (Annelida)             | 4716.0            | 26.0         |
| <i>Perinereis</i> sp. (Annelida)             | 12084.0           | 880.0        |
| <i>Sabella spallanzanii</i> (Annelida)       | 8337.0            | 1290.0       |
| <i>Eisenia</i> sp. (Annelida)                | 2854.0            | 167.0        |
| <i>Anemonia viridis</i> (Cnidaria)           | 4667.0            | 339.0        |
| <i>Paracentrotus lividus</i> (Echinodermata) | 1227.0            | 79.0         |
| <i>Bolinus brandaris</i> (Mollusca)          | 7395.0            | 171.0        |
| <i>Microcosmus sabatieri</i> (Chordata)      | 7796.0            | 271.0        |
